# Supplementary material for: Breaking aziridines to construct morpholines with a gold(i)-catalyzed tandem ring-opening and cycloisomerization reaction
Source: Royal Society of Chemistry journal article supplement (doi:10.1039/c6ob02284g), 2016-01-01

(Supporting Information)

**Breaking Aziridine to Construct Morpholine with  
Gold(I)-Catalyzed Tandem Ring-Opening and  
Cycloisomerization Reaction**

Shuyao Zhang, Chuan Shan, Shuai Zhang, Luye Yuan, Jianwu Wang,\*

Chen-Ho Tung, Ling-Bao Xing\* and Zhenghu Xu\*

*School of Chemistry and Chemical Engineering, Shandong University, Jinan 250100, PR China*

## Contents

- |                                                                 |     |
|-----------------------------------------------------------------|-----|
| 1. Optimization of the Hydrogenation Reaction Conditions        | S3  |
| 2. $^1\text{H}$ NMR and $^{13}\text{C}$ NMR Spectra of Products | S5  |
| 3. HRMS Spectra of Products                                     | S34 |

## 1. Optimization of the Hydrogenation Reaction Conditions <sup>a</sup>

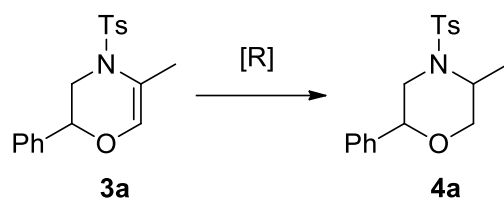

| No.             | <b>3a</b> /mmol | [R]                                         | Solvent                            | T/°C | t/h | Yield % <sup>bf</sup> | d.r. <sup>c</sup> |
|-----------------|-----------------|---------------------------------------------|------------------------------------|------|-----|-----------------------|-------------------|
| 1               | 0.2             | H <sub>2</sub> , Pd/C                       | EA                                 | 25   | 48  | -                     | -                 |
| 2               | 0.2             | H <sub>2</sub> , Pd/C                       | EtOH                               | 25   | 48  | -                     | -                 |
| 3               | 0.2             | H <sub>2</sub> , Pd/C                       | EtOH                               | 45   | 18  | 86                    | 3:1               |
| 4 <sup>d</sup>  | 0.2             | Hantzsch ester<br>+ 0.2 eq TsOH             | PhMe                               | 25   | 18  | -                     | -                 |
| 5 <sup>d</sup>  | 0.2             | Hantzsch ester<br>+ 0.2 eq TsOH             | PhMe                               | 40   | 18  | -                     | -                 |
| 6 <sup>d</sup>  | 0.2             | Hantzsch ester<br>+ 0.2 eq TsOH             | PhMe                               | 60   | 18  | -                     | -                 |
| 7 <sup>d</sup>  | 0.2             | Hantzsch ester<br>+ 1.2 eq TsOH             | THF                                | 40   | 18  | -                     | -                 |
| 8 <sup>d</sup>  | 0.2             | Hantzsch ester<br>+ 1.2 eq TsOH             | PhMe                               | 100  | 18  | -                     | -                 |
| 9 <sup>d</sup>  | 0.2             | Hantzsch ester<br>+ 1.2 eq AcOH             | PhMe                               | 100  | 18  | -                     | -                 |
| 10 <sup>d</sup> | 0.2             | Hantzsch ester                              | AcOH                               | 40   | 18  | -                     | -                 |
| 11 <sup>d</sup> | 0.2             | Hantzsch ester<br>+ 200 mg SiO <sub>2</sub> | PhMe                               | 100  | 18  | -                     | -                 |
| 12 <sup>d</sup> | 0.2             | Hantzsch ester<br>+ 1 eq Pd/C               | EtOH                               | 80   | 18  | -                     | -                 |
| 13 <sup>d</sup> | 0.2             | NaBHET <sub>3</sub> +<br>0.2 eq TsOH        | PhMe                               | 25   | 18  | -                     | -                 |
| 14 <sup>d</sup> | 0.2             | NaBH <sub>4</sub> + 1 eq<br>AcOH            | MeOH                               | 25   | 18  | -                     | -                 |
| 15 <sup>d</sup> | 0.2             | NaBHET <sub>3</sub>                         | PhMe                               | 25   | 18  | -                     | -                 |
| 16              | 0.2             | H <sub>2</sub> , Pd/C                       | EA                                 | 45   | 18  | -                     | -                 |
| 17 <sup>e</sup> | 0.2             | H <sub>2</sub> , Pd/C                       | THF                                | 45   | 18  | 43                    | 12:1              |
| 18              | 0.2             | H <sub>2</sub> , Pd/C                       | THF                                | 45   | 18  | -                     | -                 |
| 19              | 0.2             | H <sub>2</sub> , Pd/C                       | THF                                | 60   | 18  | -                     | -                 |
| 20              | 0.2             | H <sub>2</sub> , Pd/C                       | THF + 0.4 mmol<br>H <sub>2</sub> O | 45   | 18  | -                     | -                 |

|           |            |                            |                                  |           |           |           |             |
|-----------|------------|----------------------------|----------------------------------|-----------|-----------|-----------|-------------|
| 21        | 0.2        | H <sub>2</sub> , Pd/C      | THF + 4 mmol<br>H <sub>2</sub> O | 45        | 18        | 64        | 5:1         |
| 22        | 0.2        | H <sub>2</sub> , Pd/C      | THF + 0.4 mmol<br>t-BuOH         | 45        | 18        | -         | -           |
| 23        | 0.2        | H <sub>2</sub> , Pd/C      | THF + 1 mmol<br>t-BuOH           | 45        | 18        | -         | -           |
| 24        | 0.2        | H <sub>2</sub> , Pd/C      | THF + 1 mmol<br>i-PrOH           | 45        | 18        | -         | -           |
| 25        | 0.2        | H <sub>2</sub> , Pd/C      | THF + 1 mmol<br>EtOH             | 45        | 18        | -         | -           |
| 26        | 0.2        | H <sub>2</sub> , Pd/C      | THF + 0.2 mmol<br>AcOH           | 45        | 18        | -         | -           |
| <b>27</b> | <b>0.2</b> | <b>H<sub>2</sub>, Pd/C</b> | <b>t-BuOH</b>                    | <b>45</b> | <b>18</b> | <b>95</b> | <b>16:1</b> |
| 28        | 0.2        | H <sub>2</sub> , Pd/C      | THF : t-BuOH = 3:1               | 45        | 18        | 65        | >95:5       |
| 29        | 0.2        | H <sub>2</sub> , Pd/C      | THF : EtOH = 10:1                | 45        | 18        | 92        | 10:1        |

<sup>a</sup> When using H<sub>2</sub> as reductant, the condition is: **3a** (0.2 mmol), H<sub>2</sub> (1 atm), Pd/C (0.2 mmol), solvent (3 ml); When using other reductant, the condition is: A (0.2 mmol), [R] (0.4 mmol), solvent (3 ml). <sup>b</sup> Isolated yield. <sup>c</sup> diastereomer ratio determined by <sup>1</sup>H NMR. <sup>d</sup> Under N<sub>2</sub> atmosphere. <sup>e</sup> Exposed in air unwittingly. <sup>f</sup> '-' indicates no reaction happened.

## 2. <sup>1</sup>H NMR and <sup>13</sup>C NMR Spectra of Products

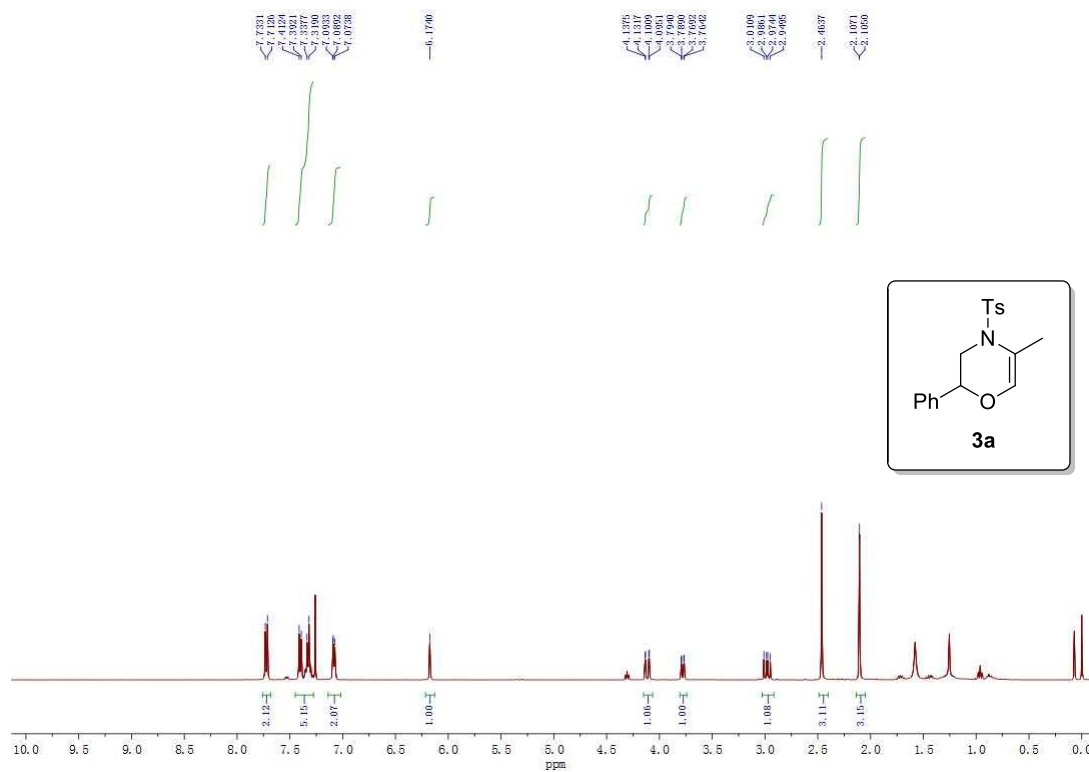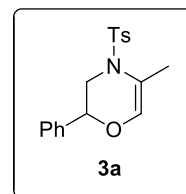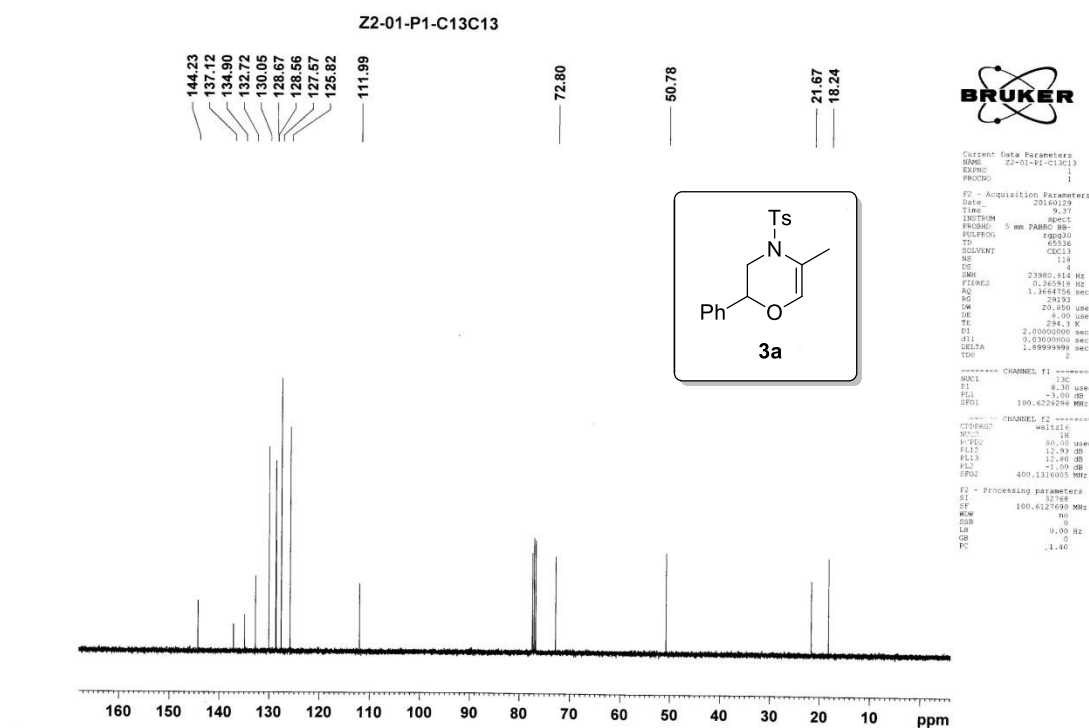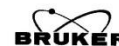

Current Data Parameters  
 NAME Z2-01-P1-C13C13  
 EXPNO 1  
 PROCNO 1  
 F2 - Acquisition Parameters  
 Date\_ 20160229  
 Time 9.37  
 INSTRUM spect  
 PROCNO 88  
 FREQMC 500.136099  
 PULPROG zgpg30  
 TD 65536  
 SOLVENT CDCl3  
 NS 118  
 DS 4  
 SWH 23980.414 Hz  
 FIDRES 0.365916 Hz  
 AQ 1.3644756 sec  
 RG 293.93  
 DW 20.450 usec  
 DE 4.00 usec  
 TE 294.3 K  
 D1 2.00000000 sec  
 d11 0.03000000 sec  
 DELTA 2.88999999 sec  
 TD0 2  
 ----- CHANNEL f1 -----  
 NUC1 13C  
 P1 8.30 usec  
 PL1 -1.00 dB  
 SFO1 100.6229299 MHz  
 ----- CHANNEL f2 -----  
 NUC2 1H  
 M1PC2 60.00 usec  
 PL12 12.93 dB  
 PL13 12.40 dB  
 PL14 -1.09 dB  
 SFO2 400.1316995 MHz  
 F2 - Processing parameters  
 SI 32768  
 SF 100.6127690 MHz  
 KW no  
 SUB 0  
 LB 0.00 Hz  
 GB 0  
 PC 1.40

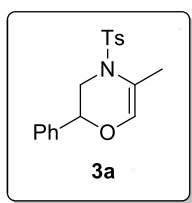

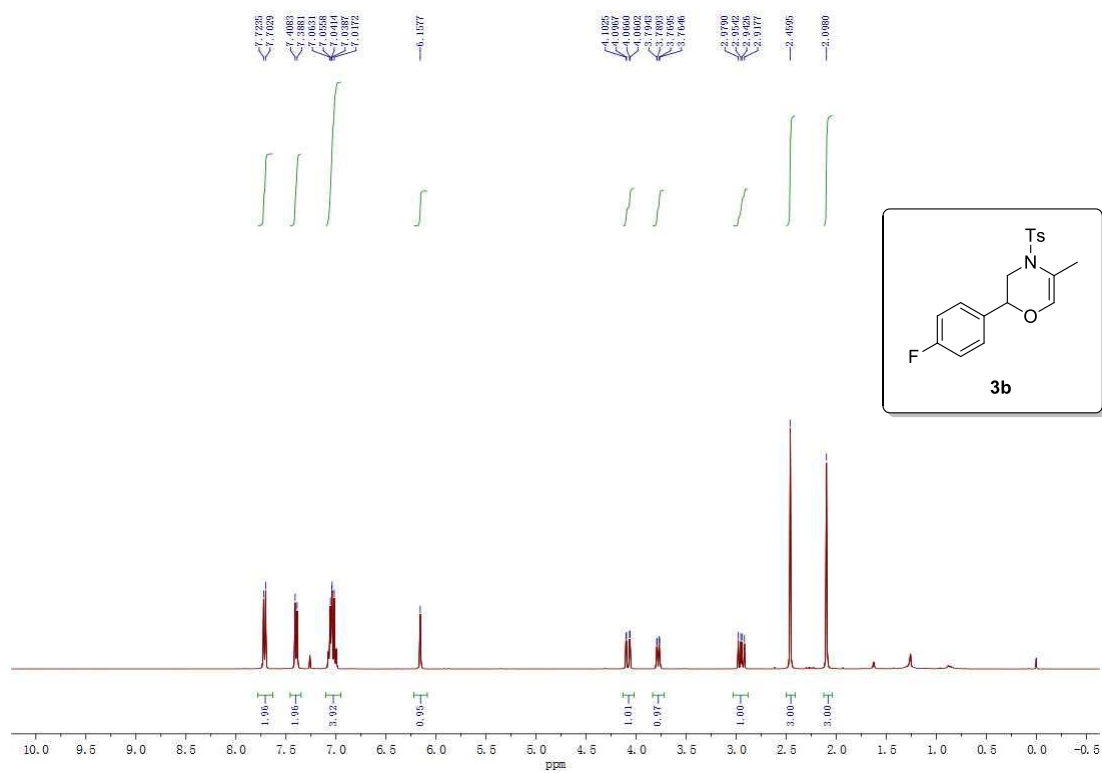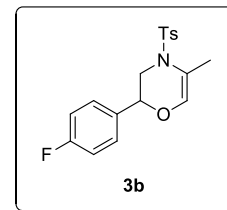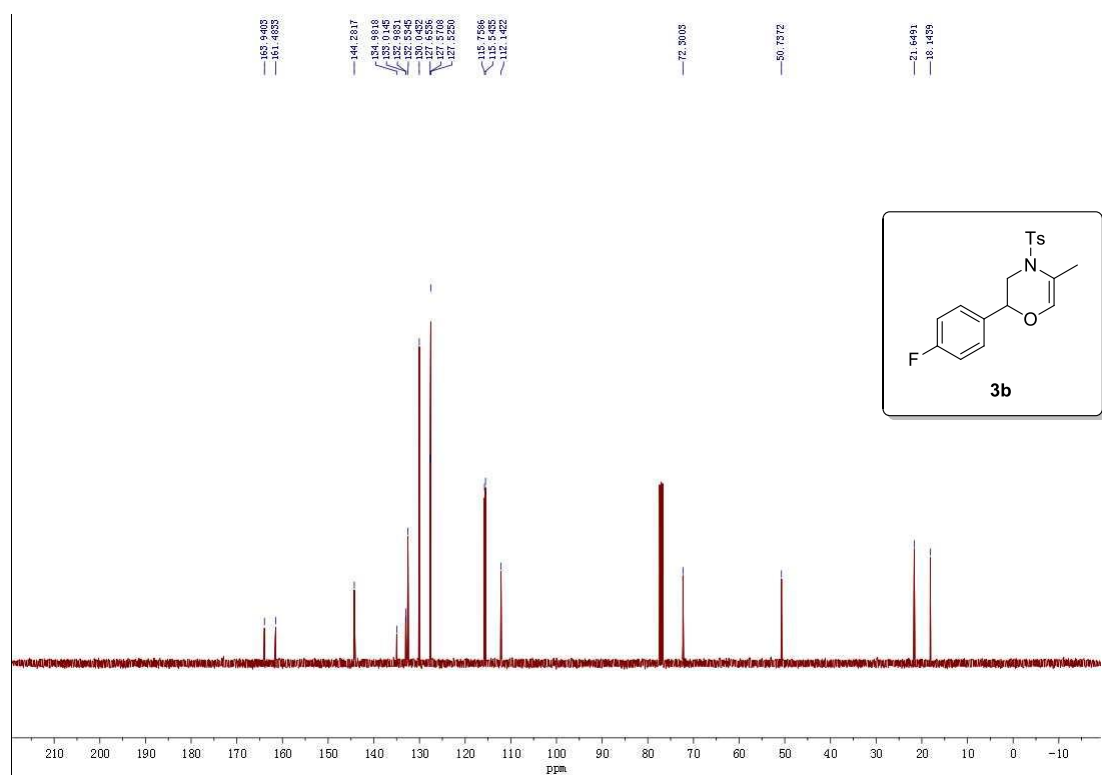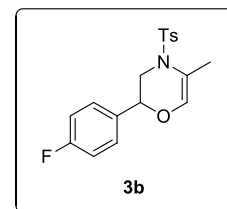

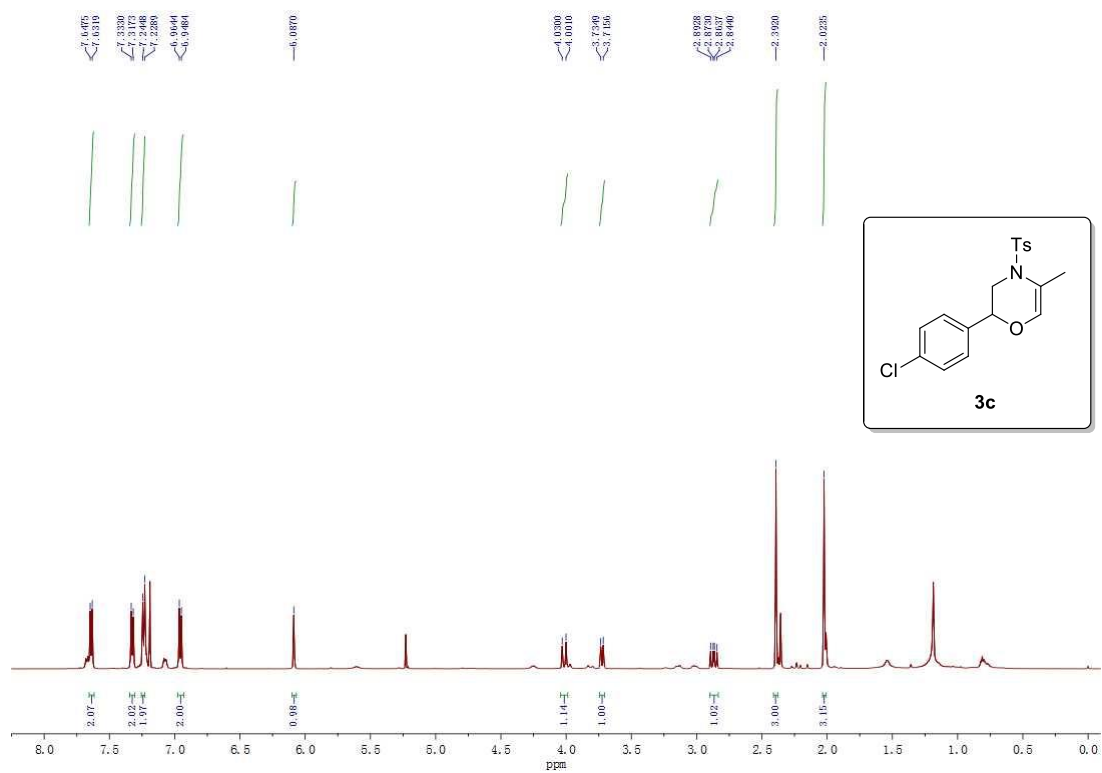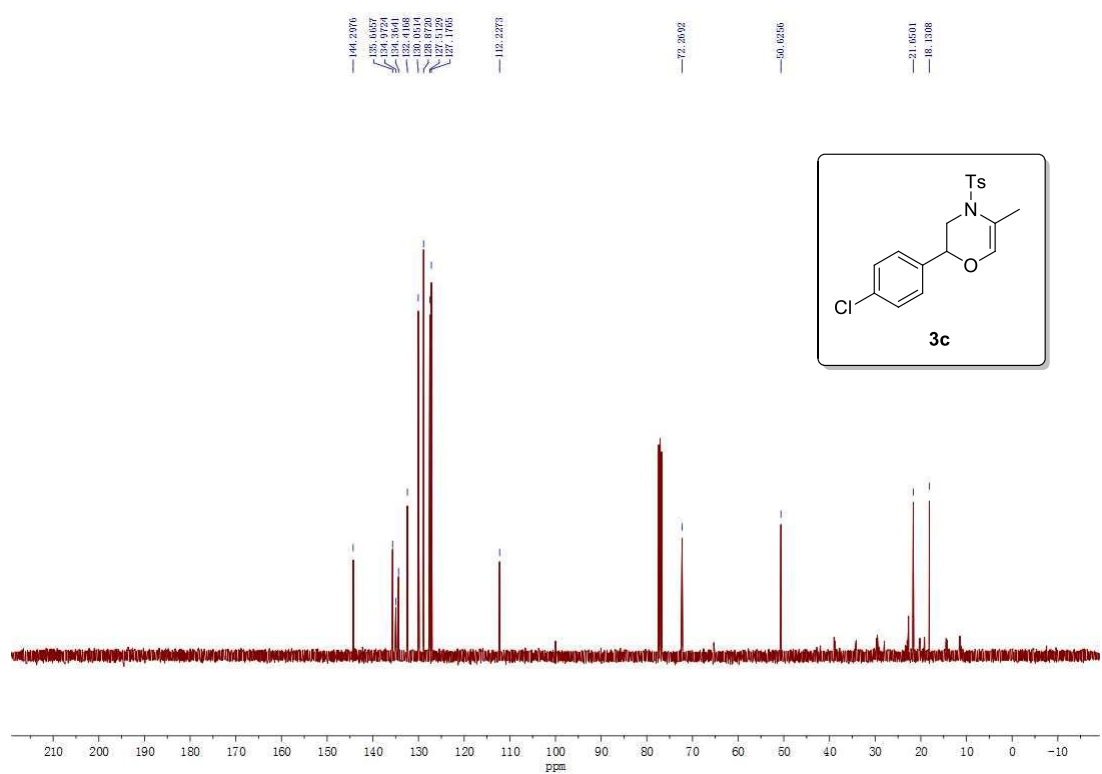

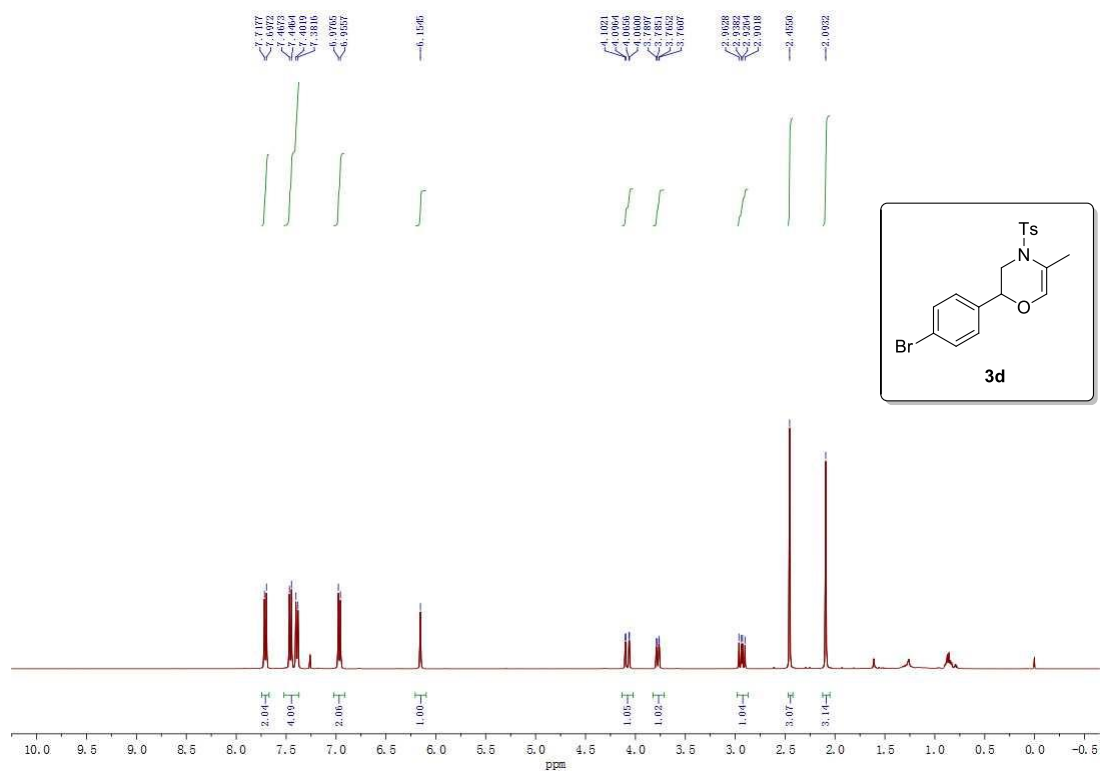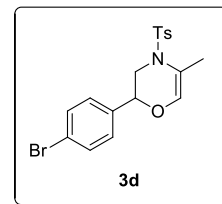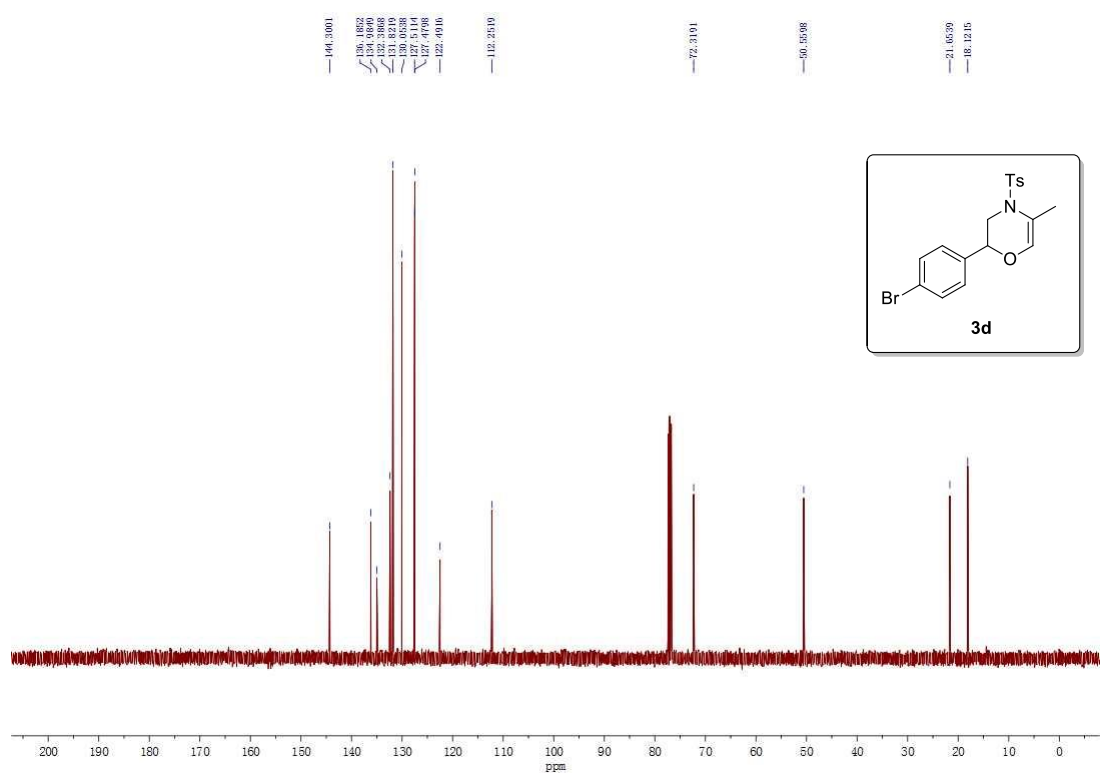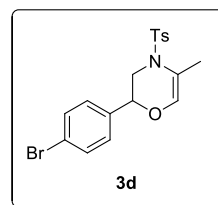



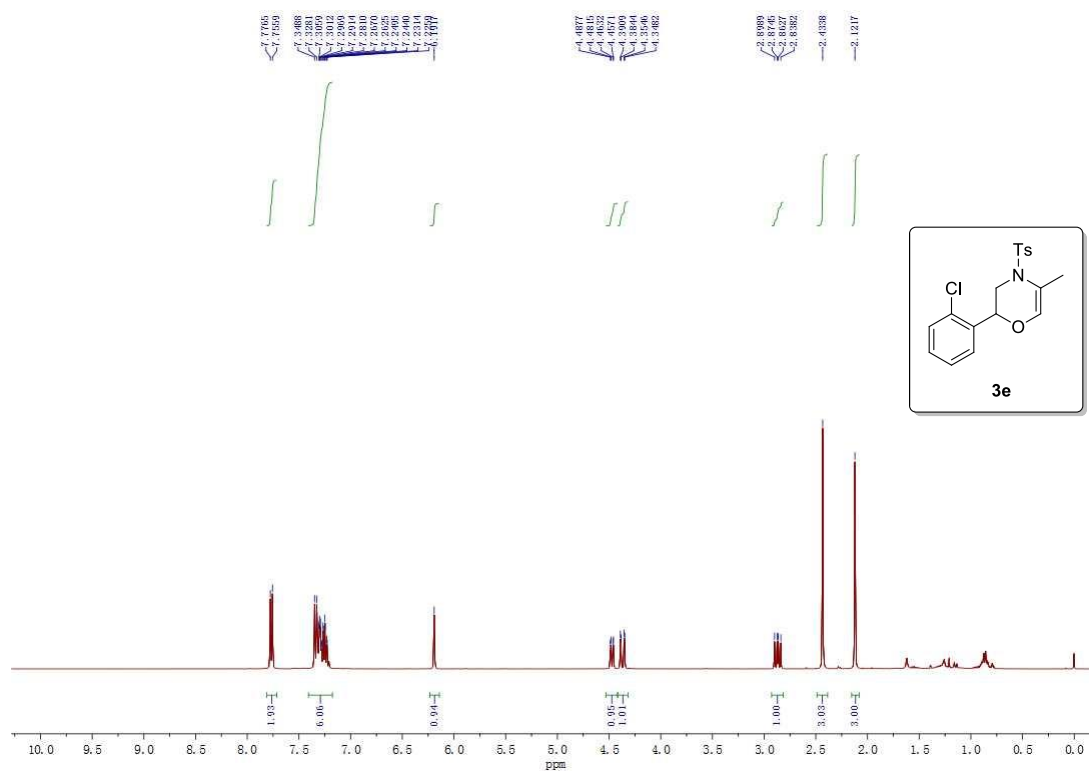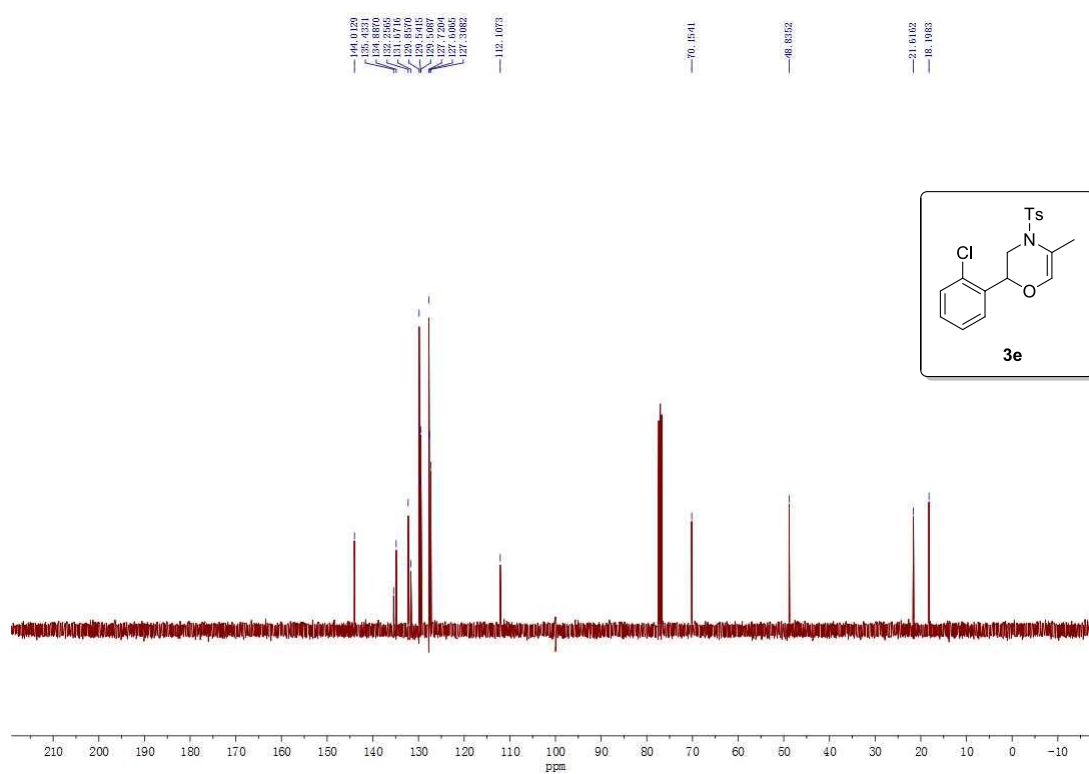

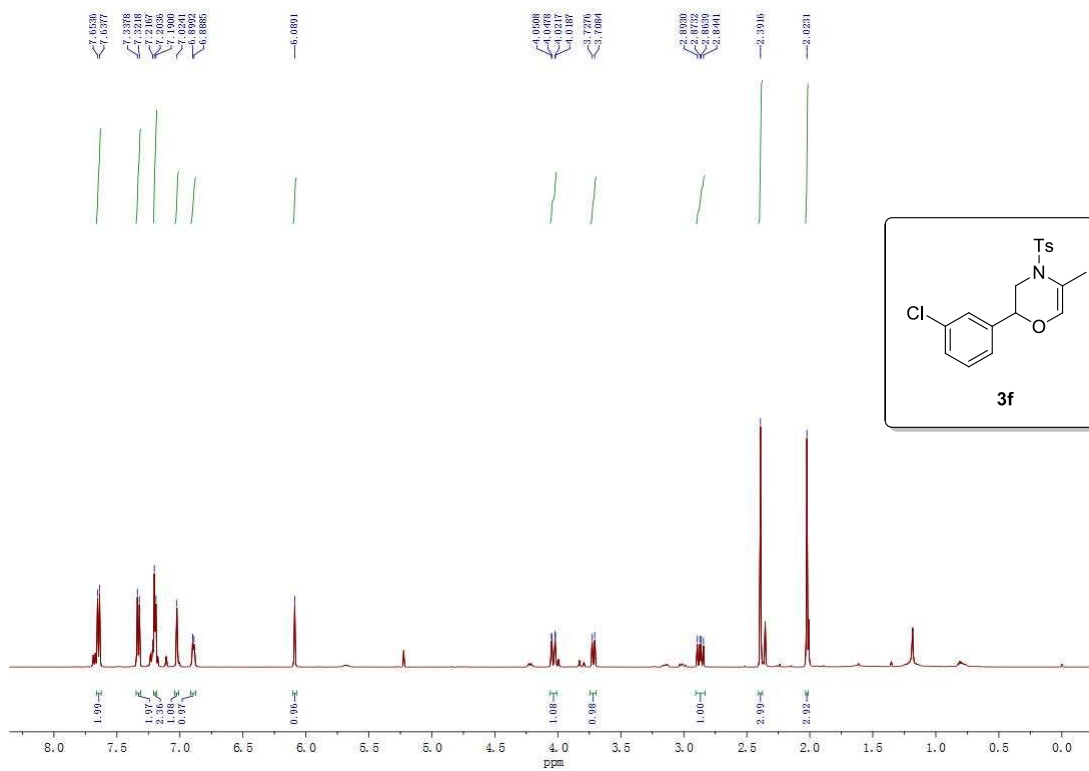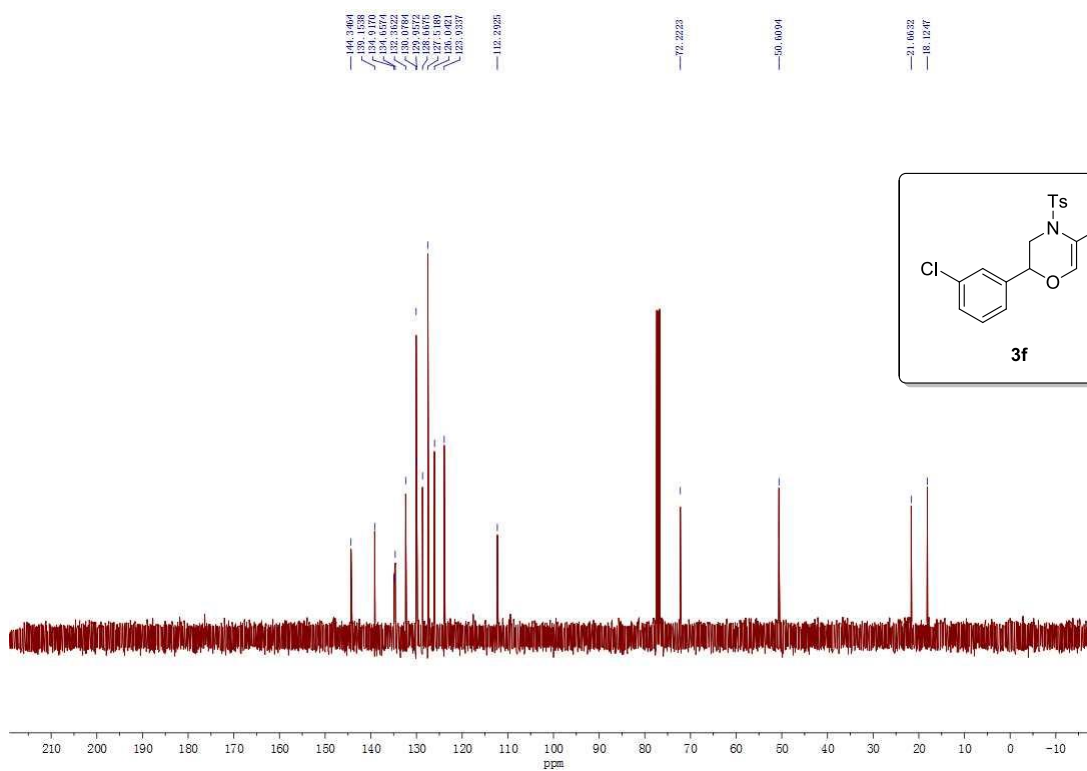

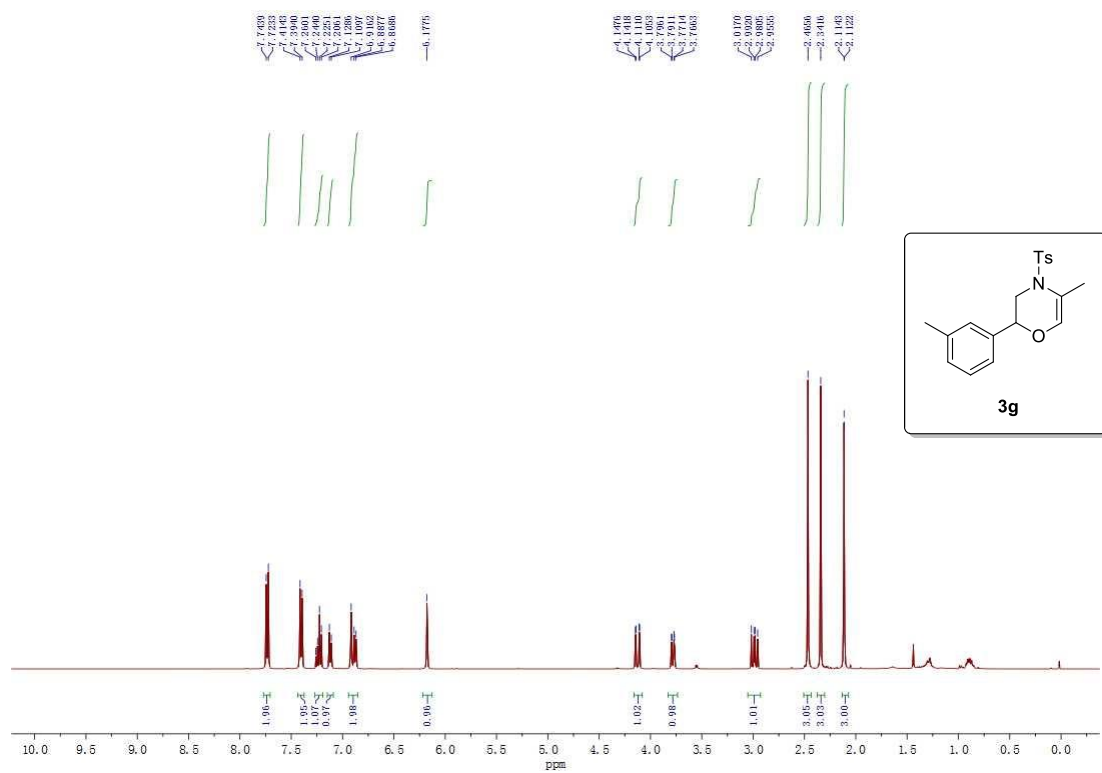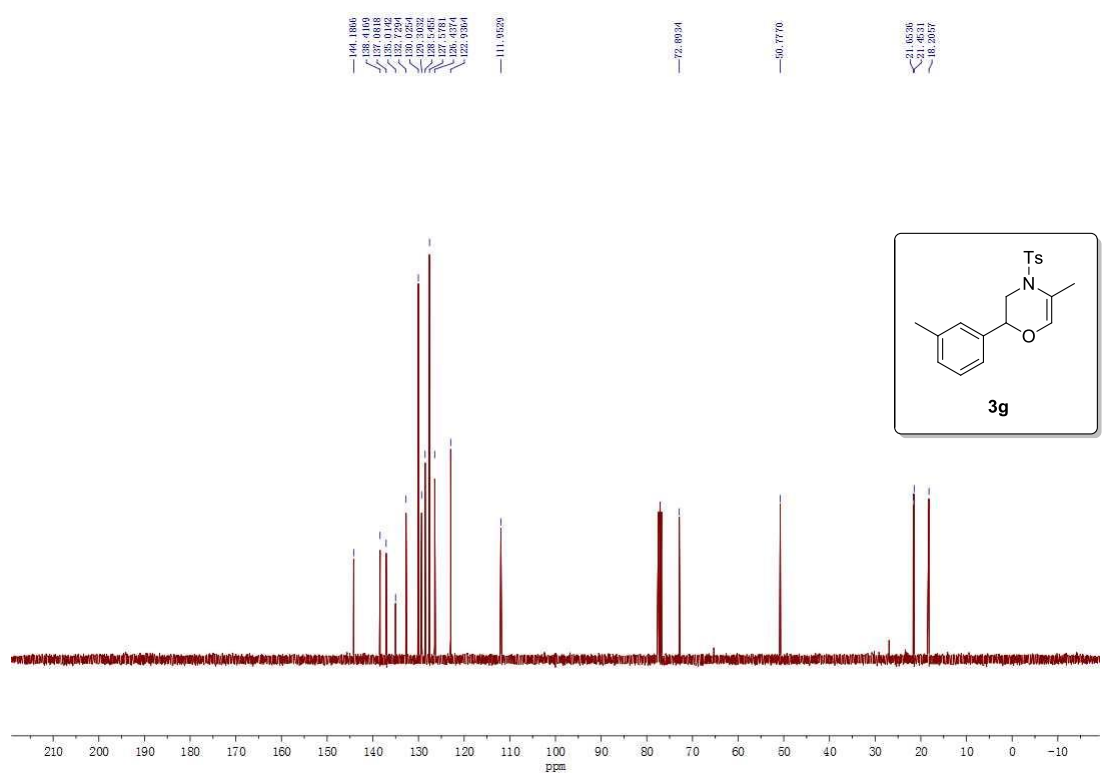



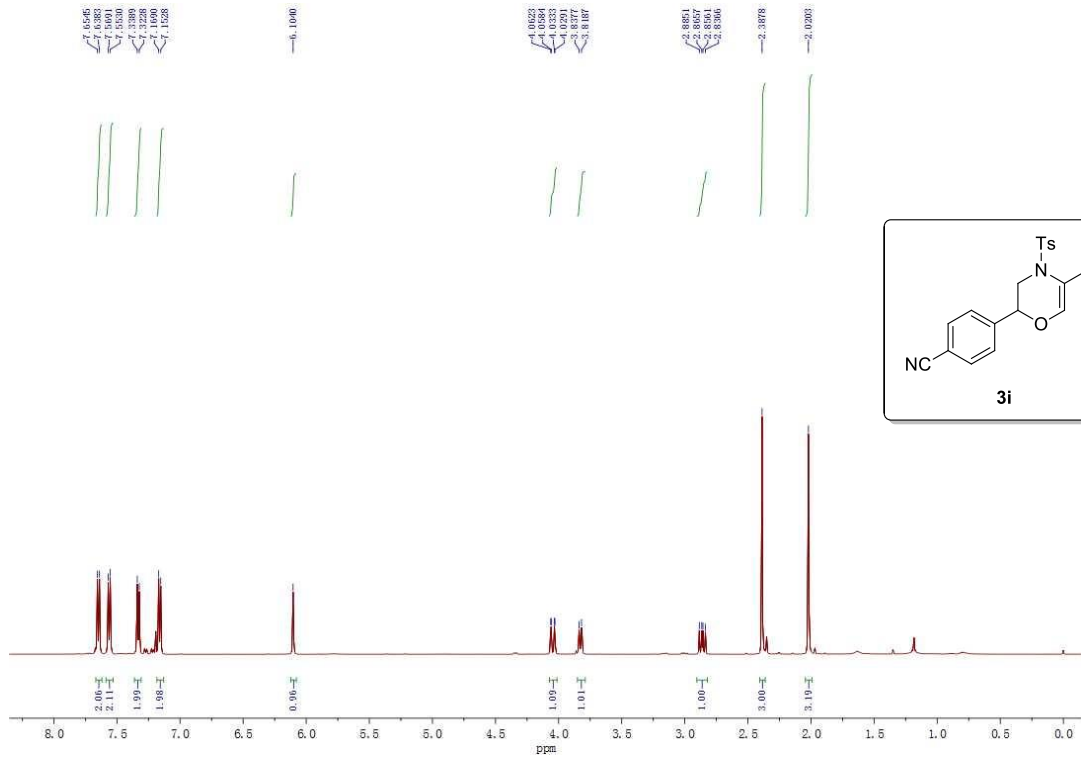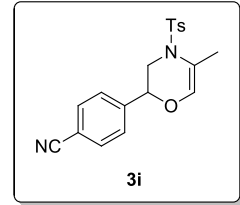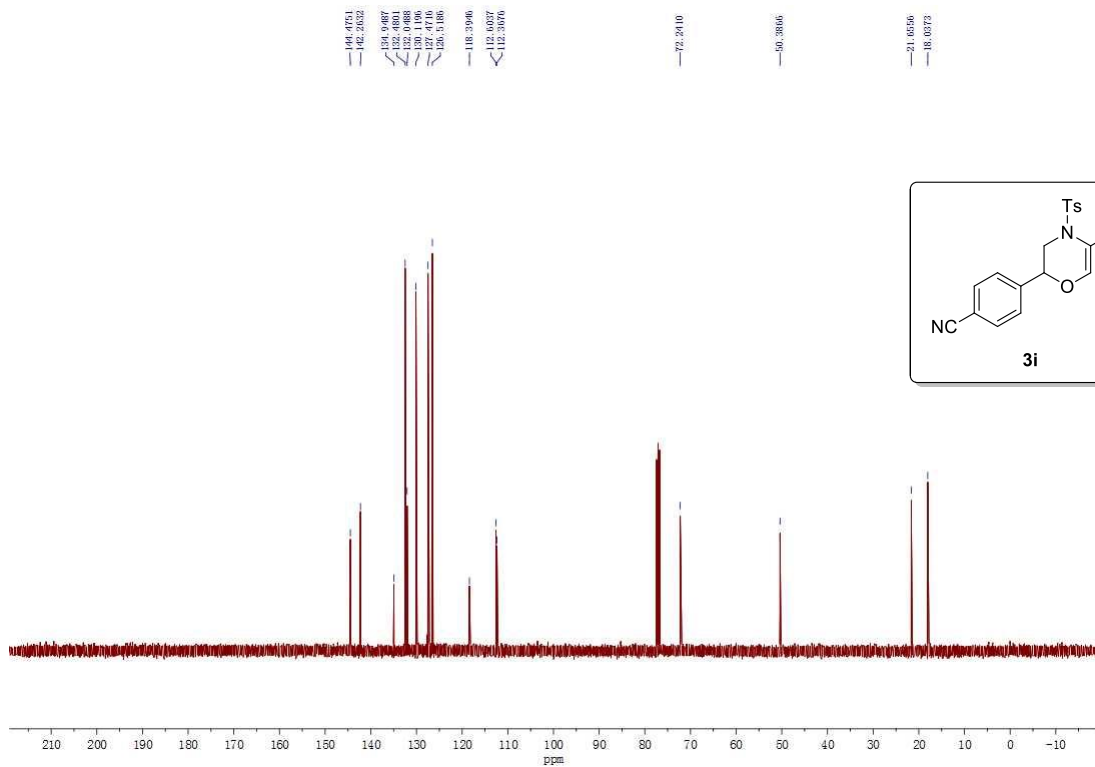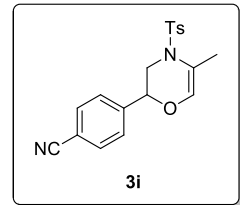

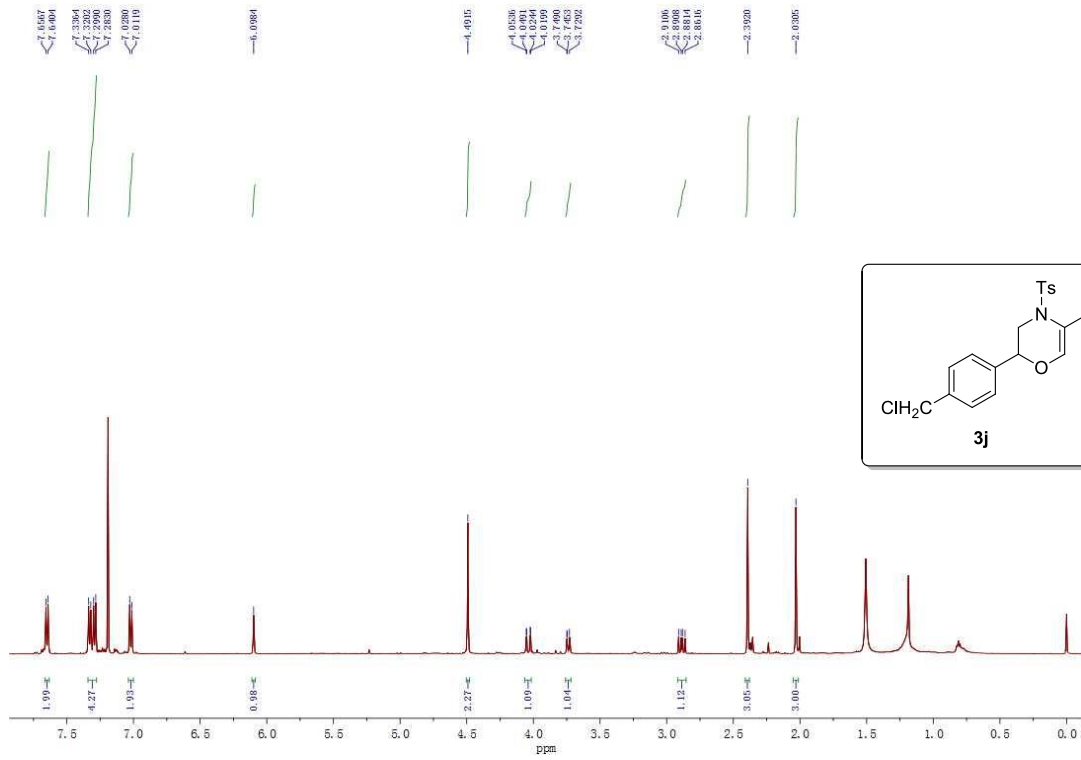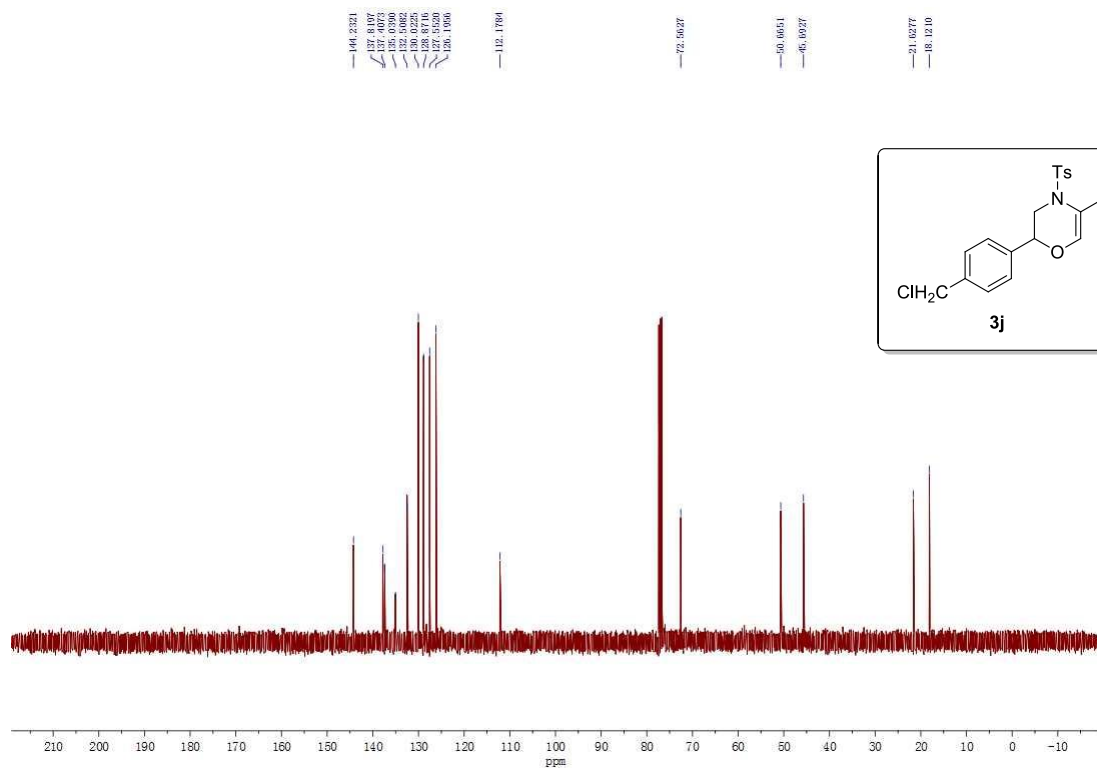

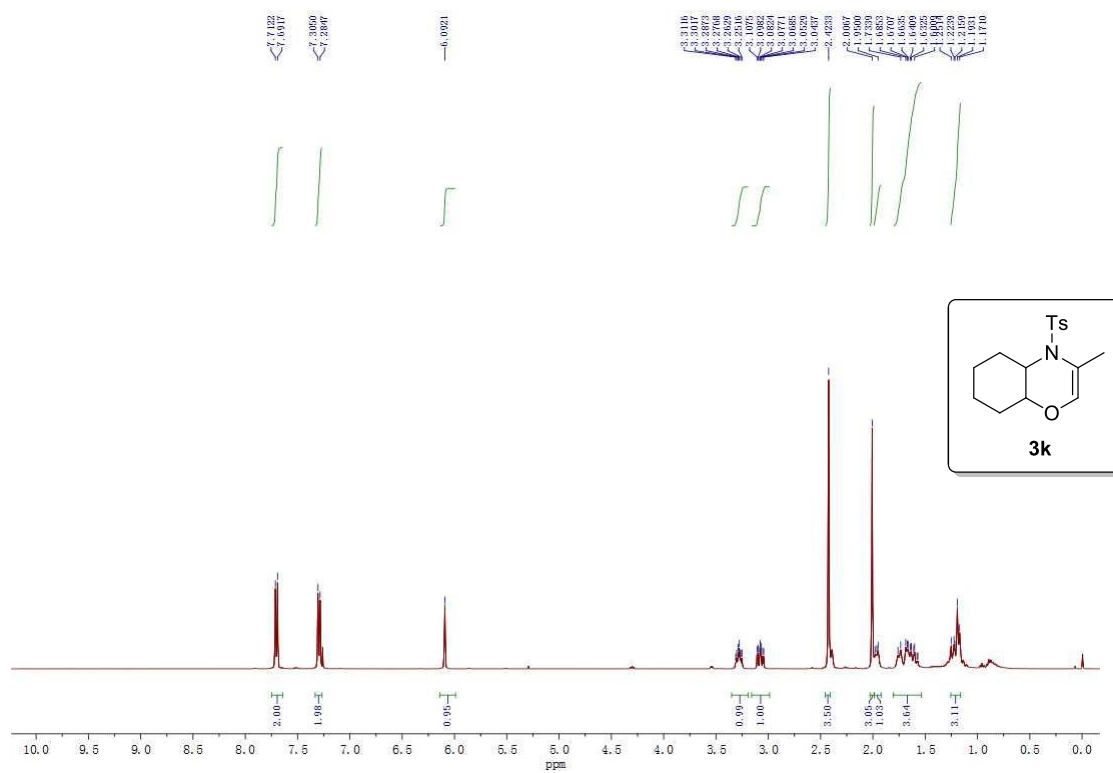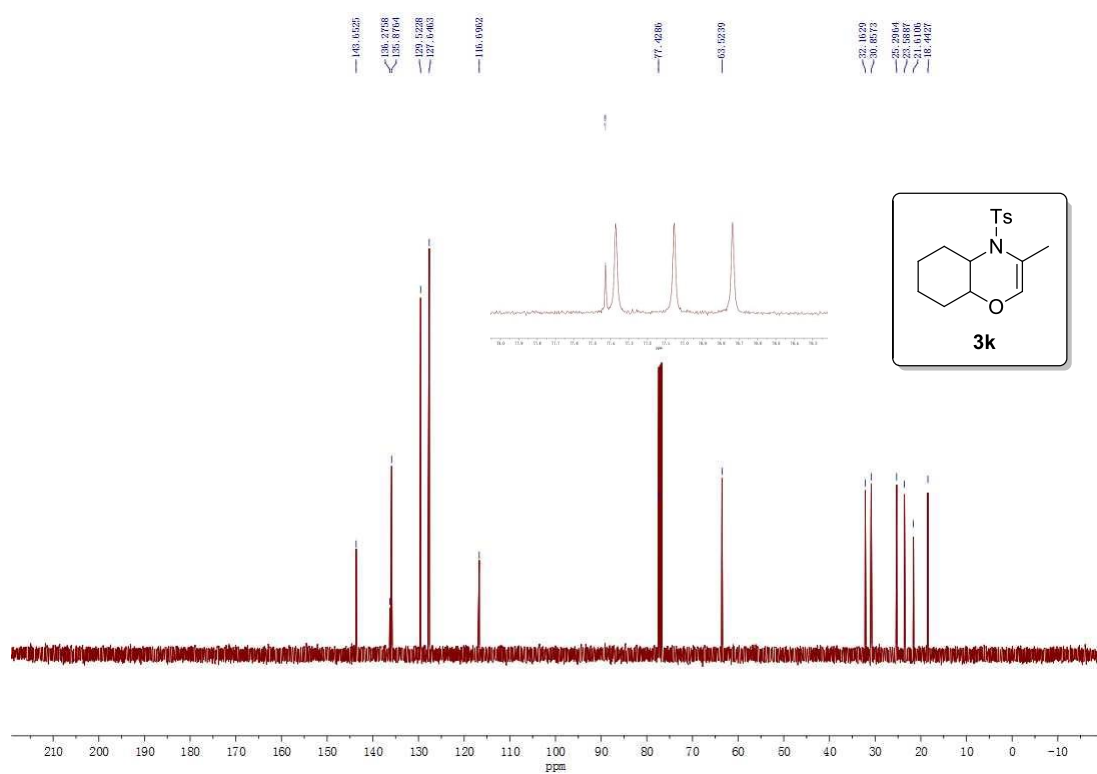





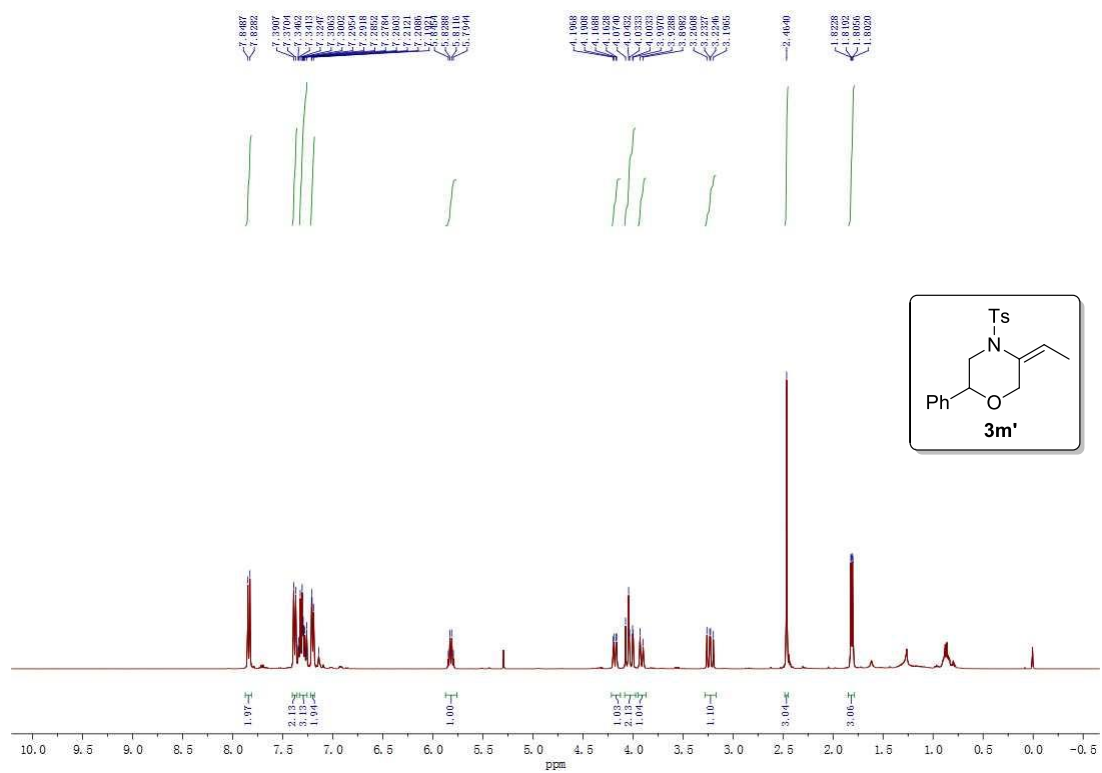

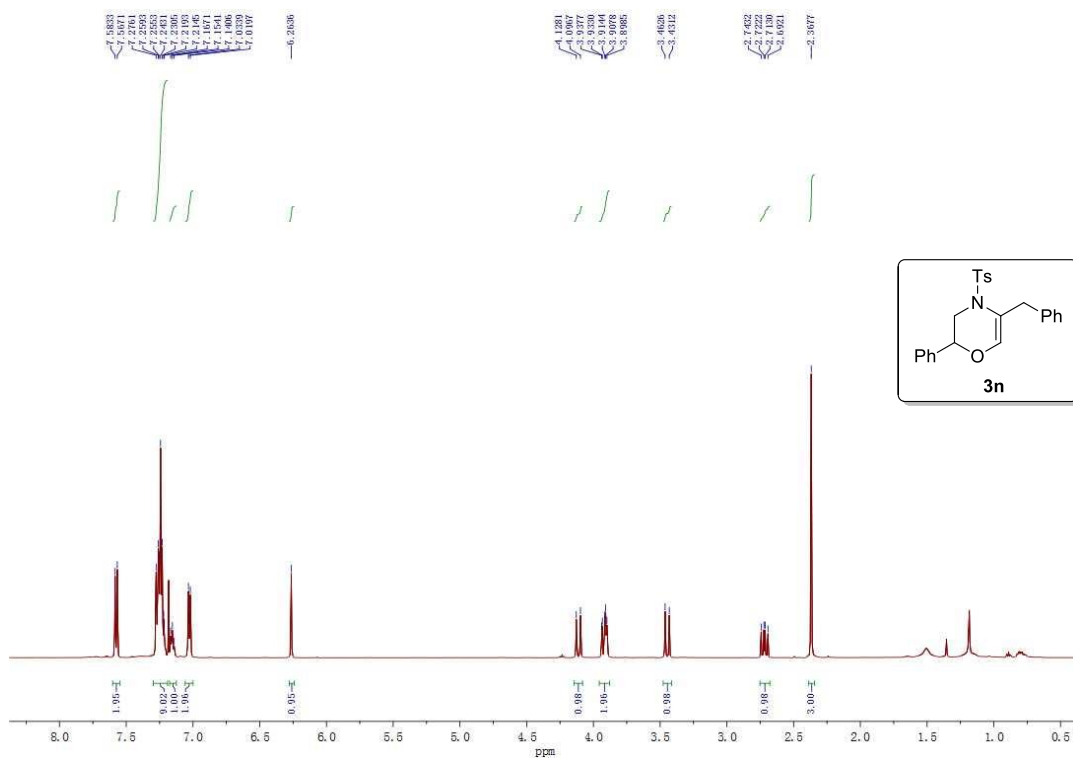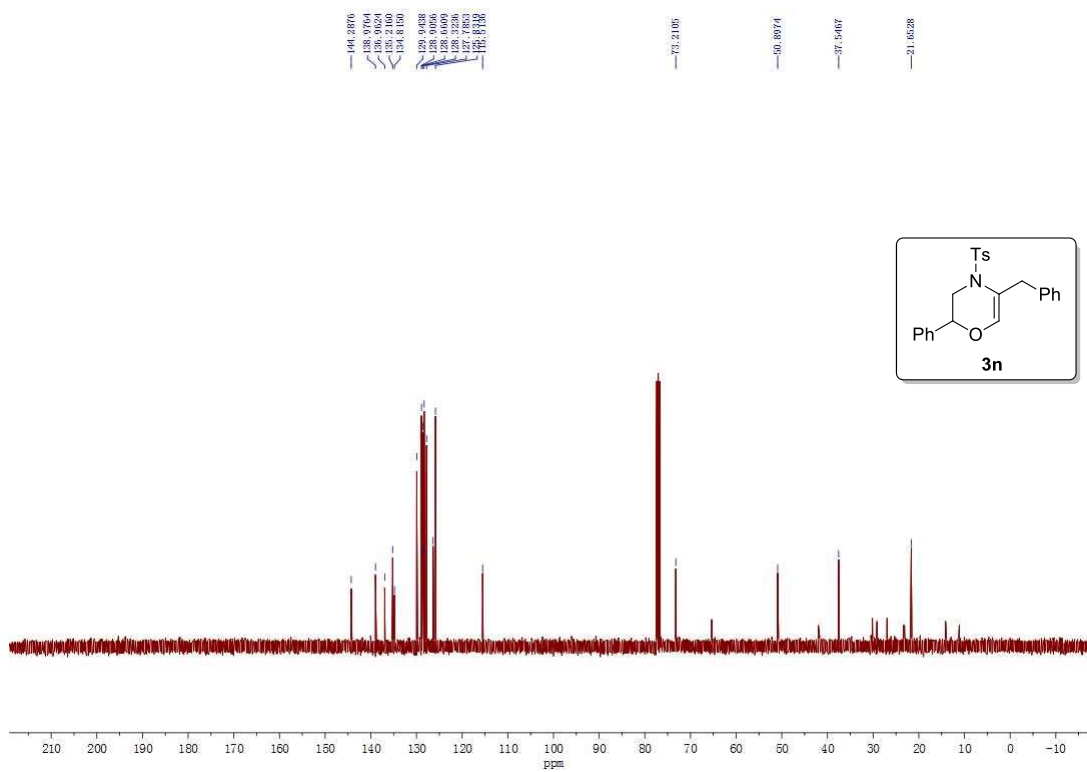

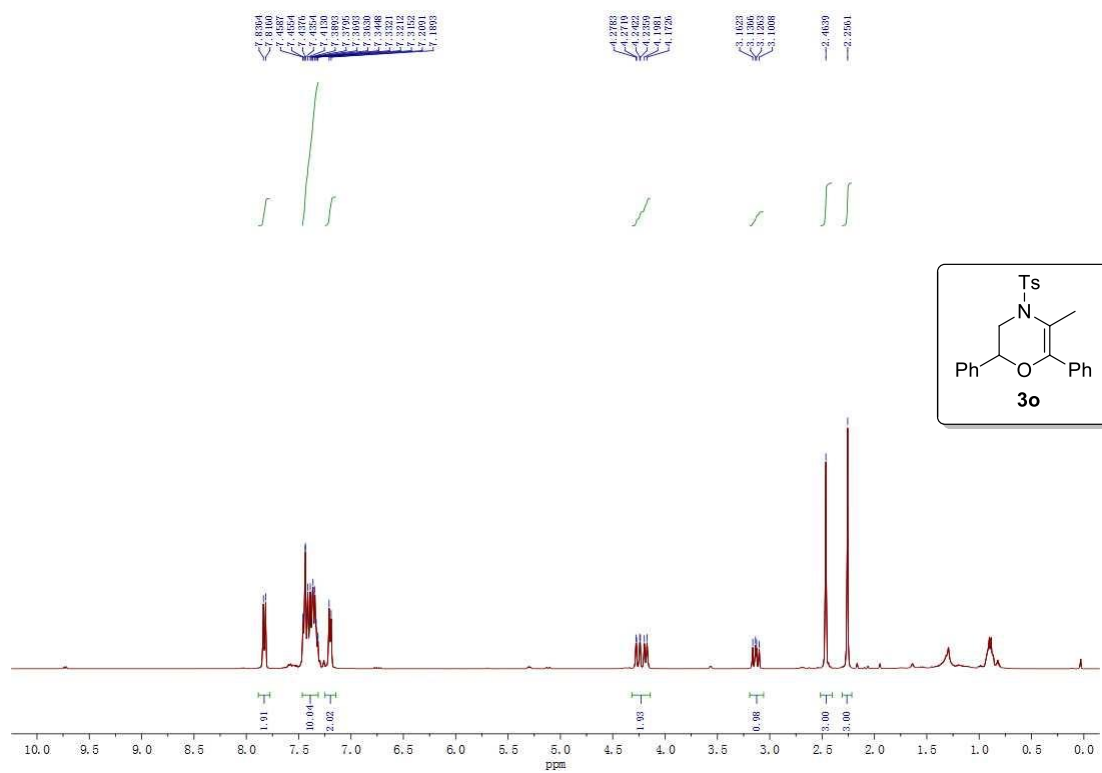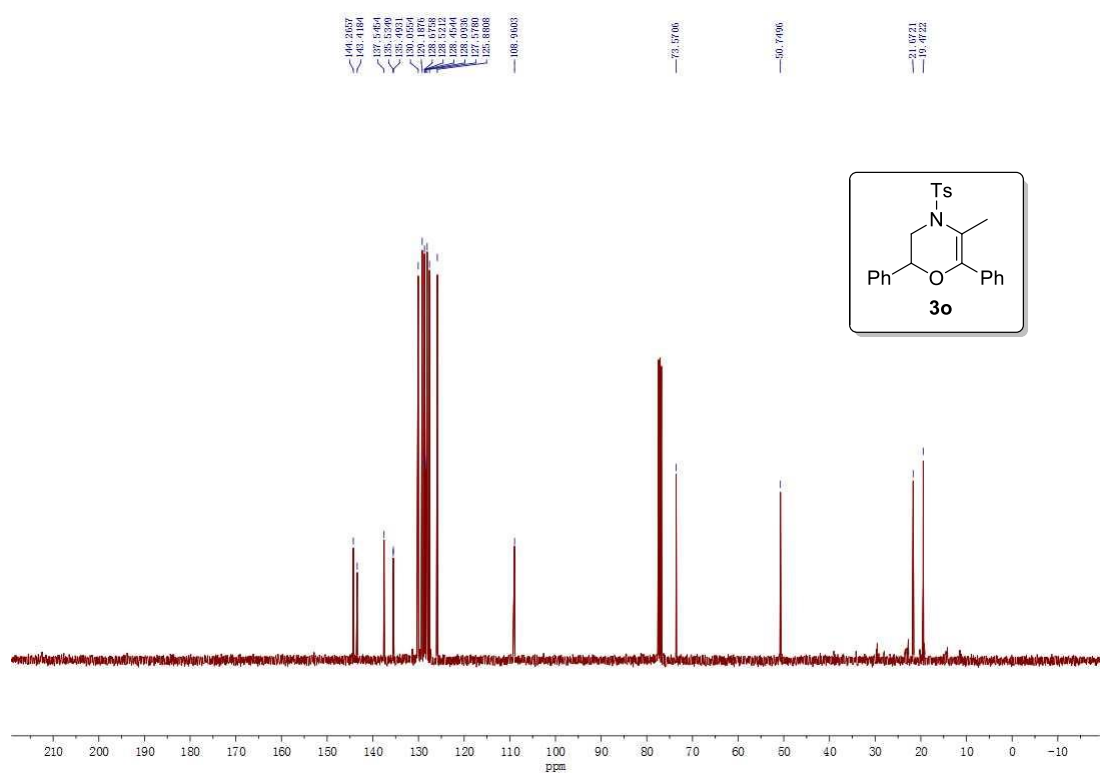

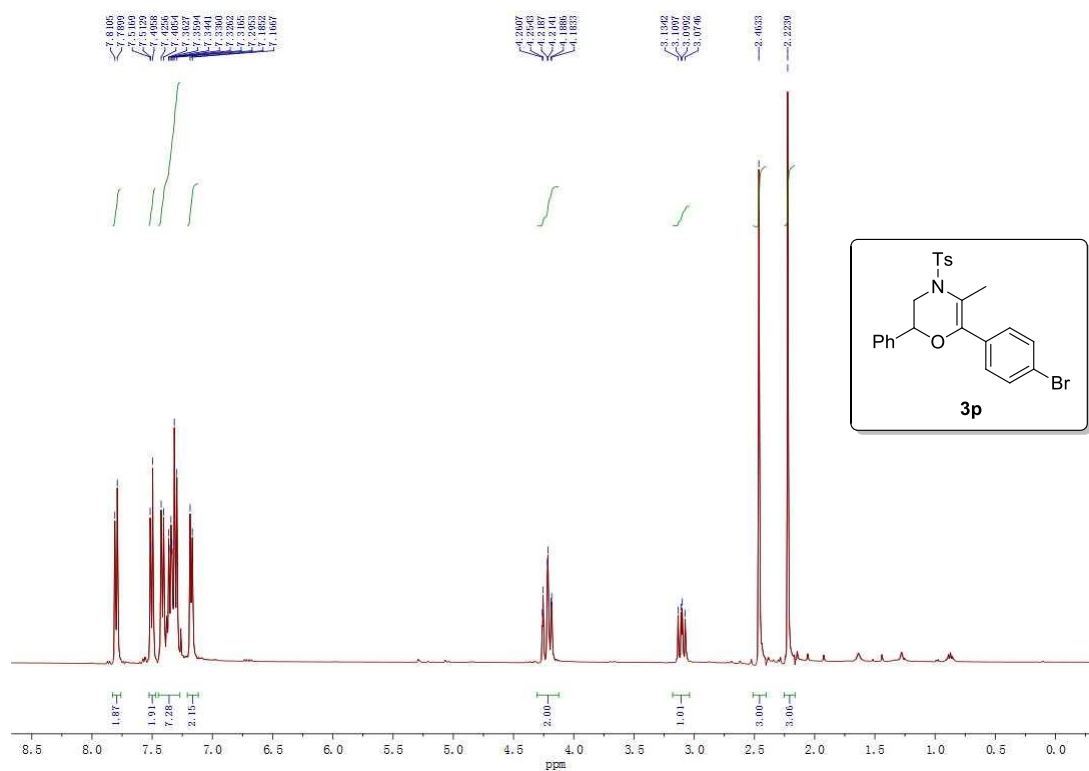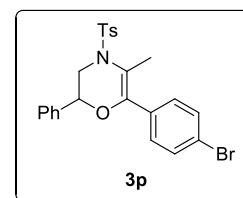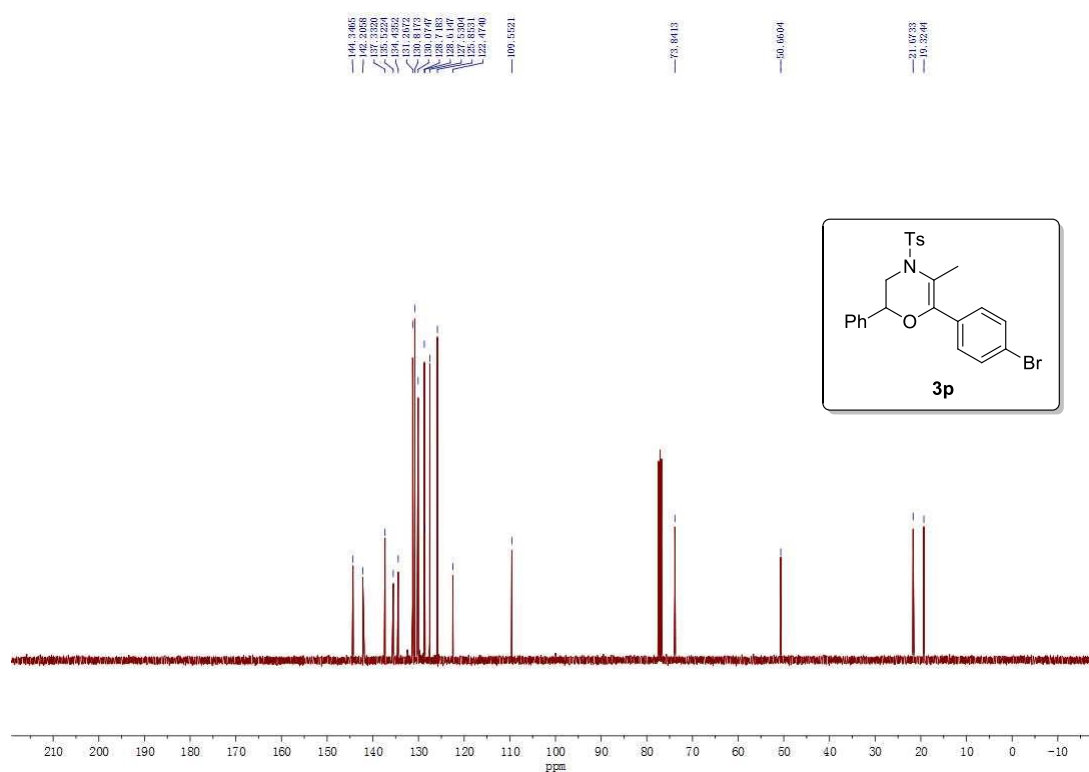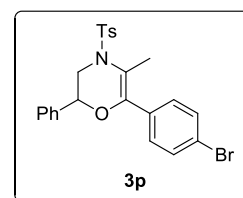

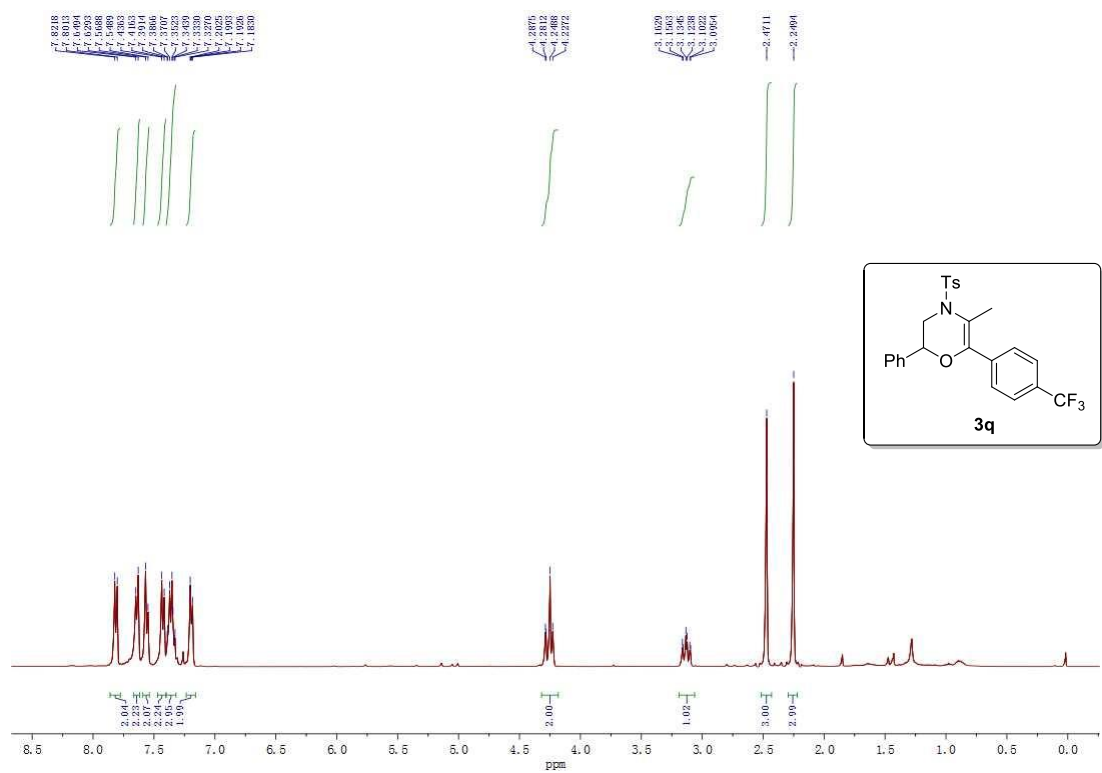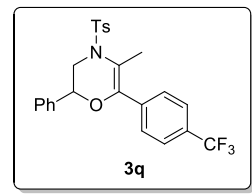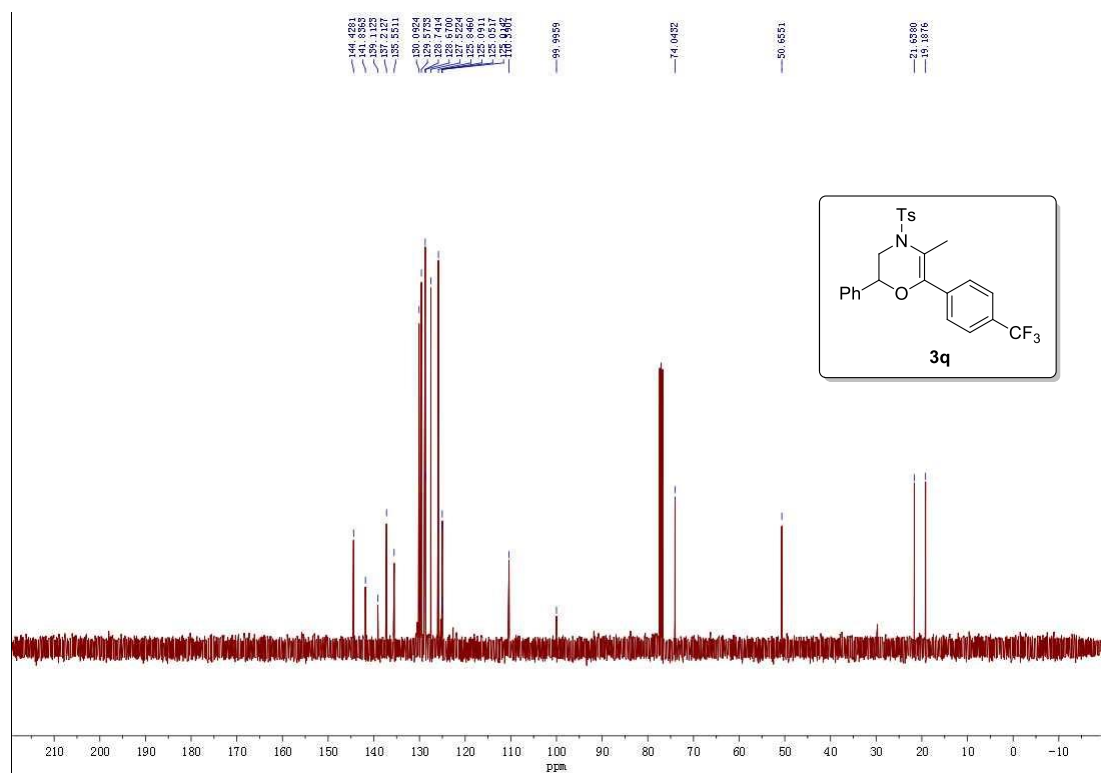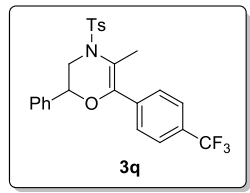

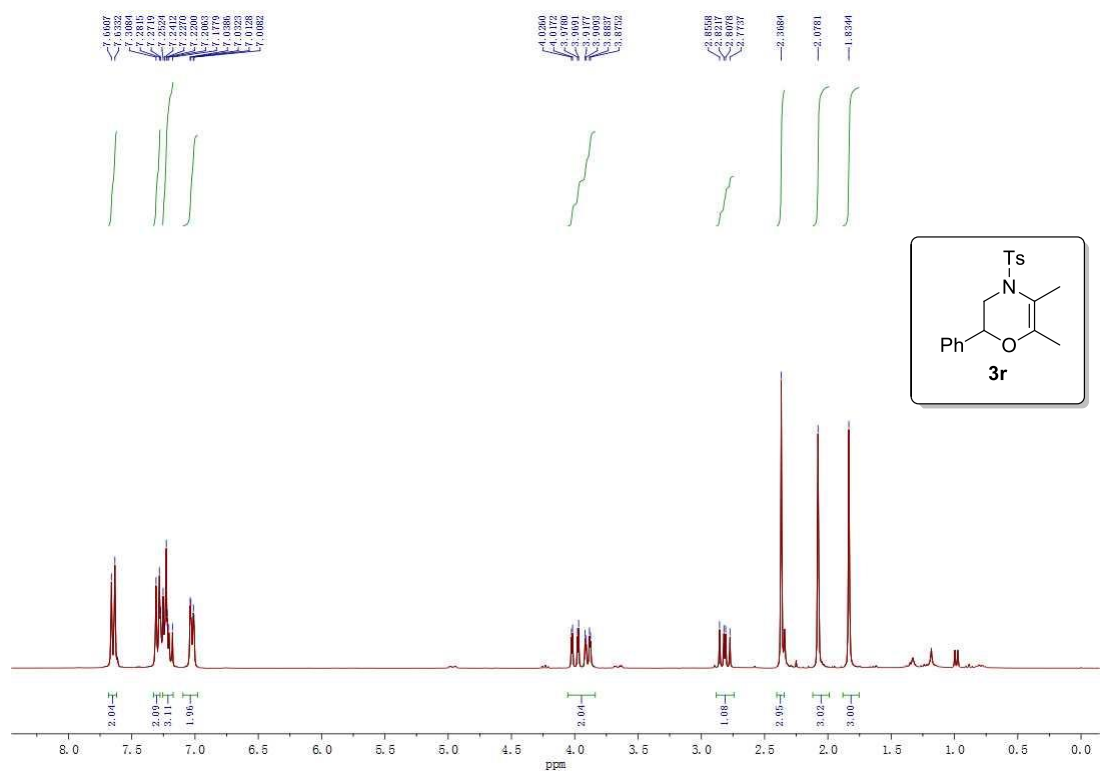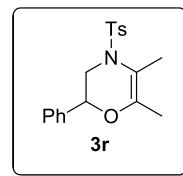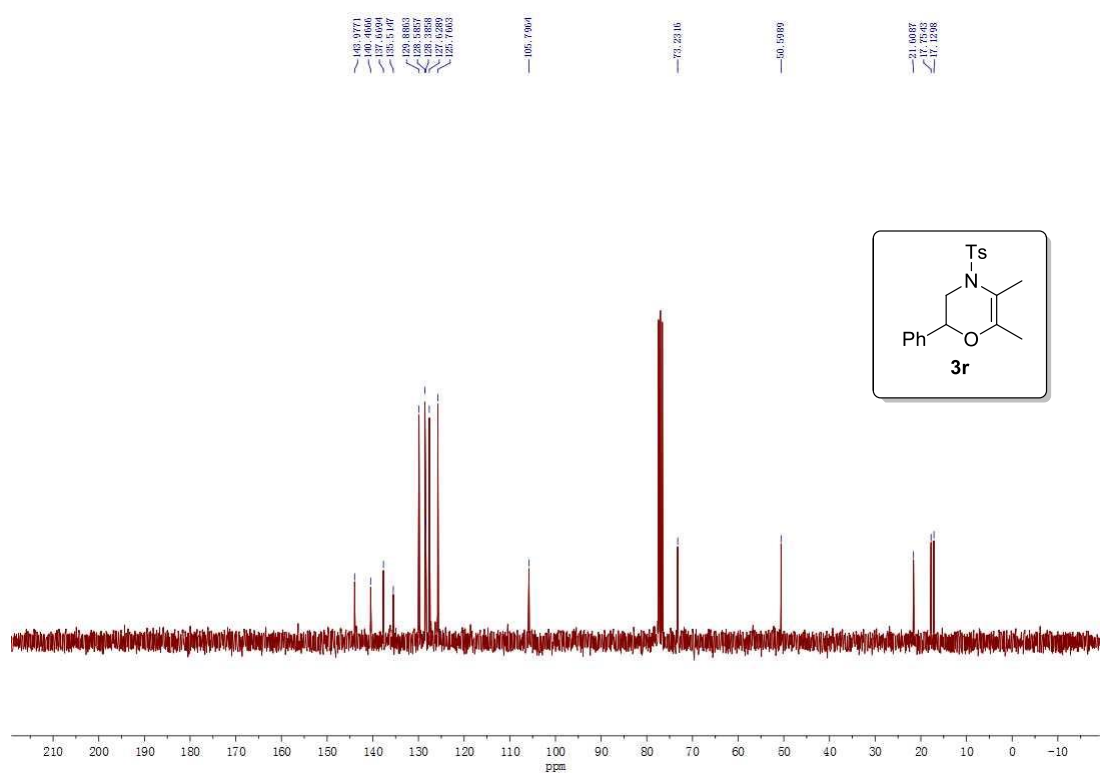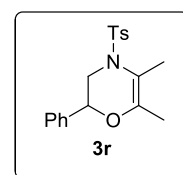

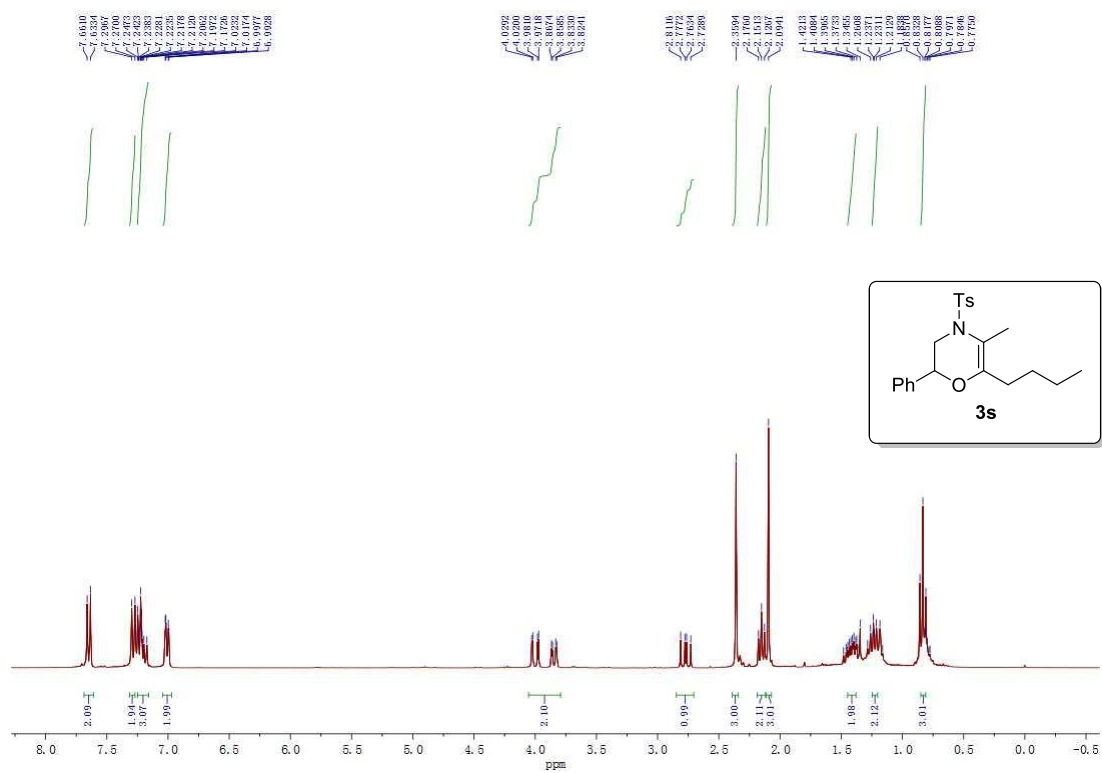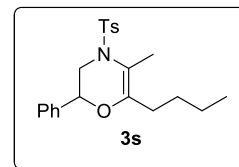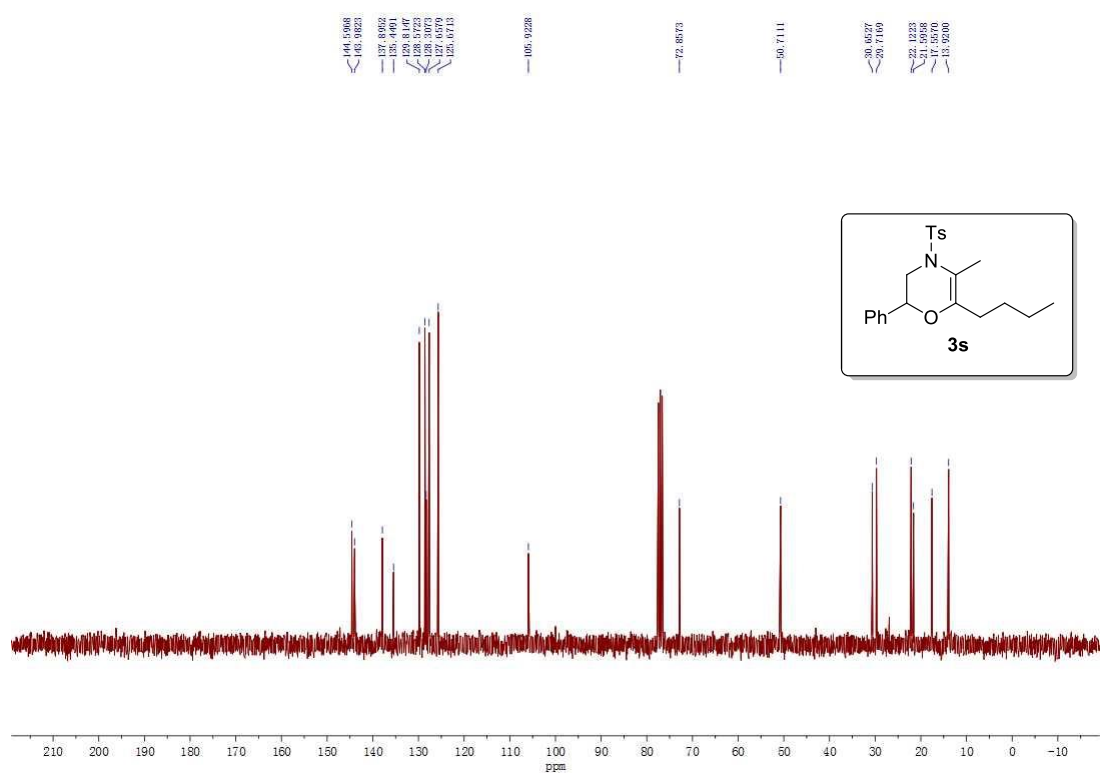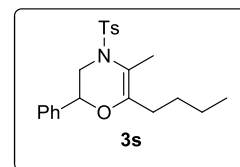

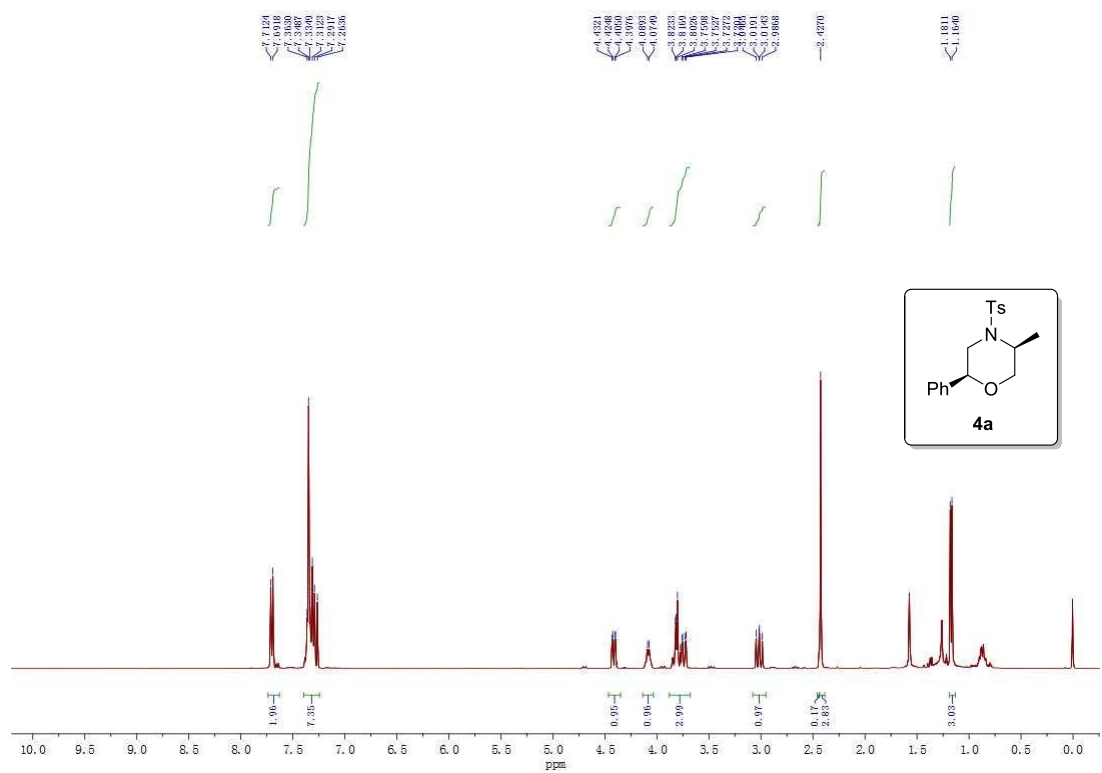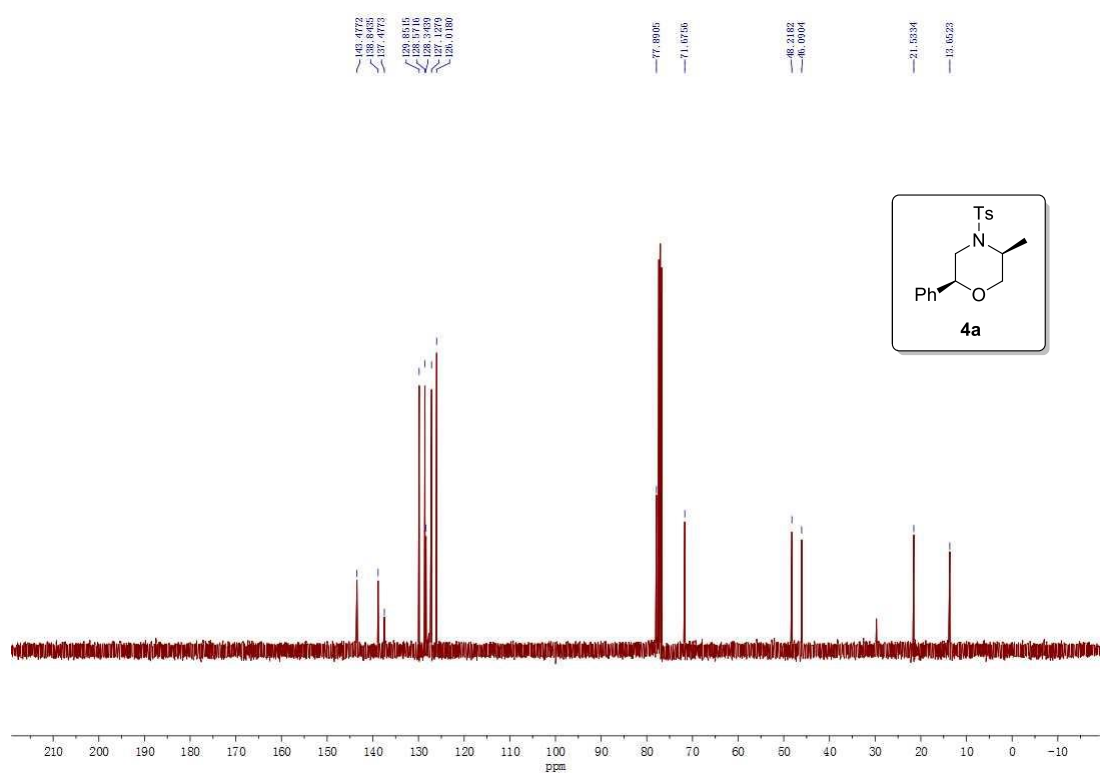



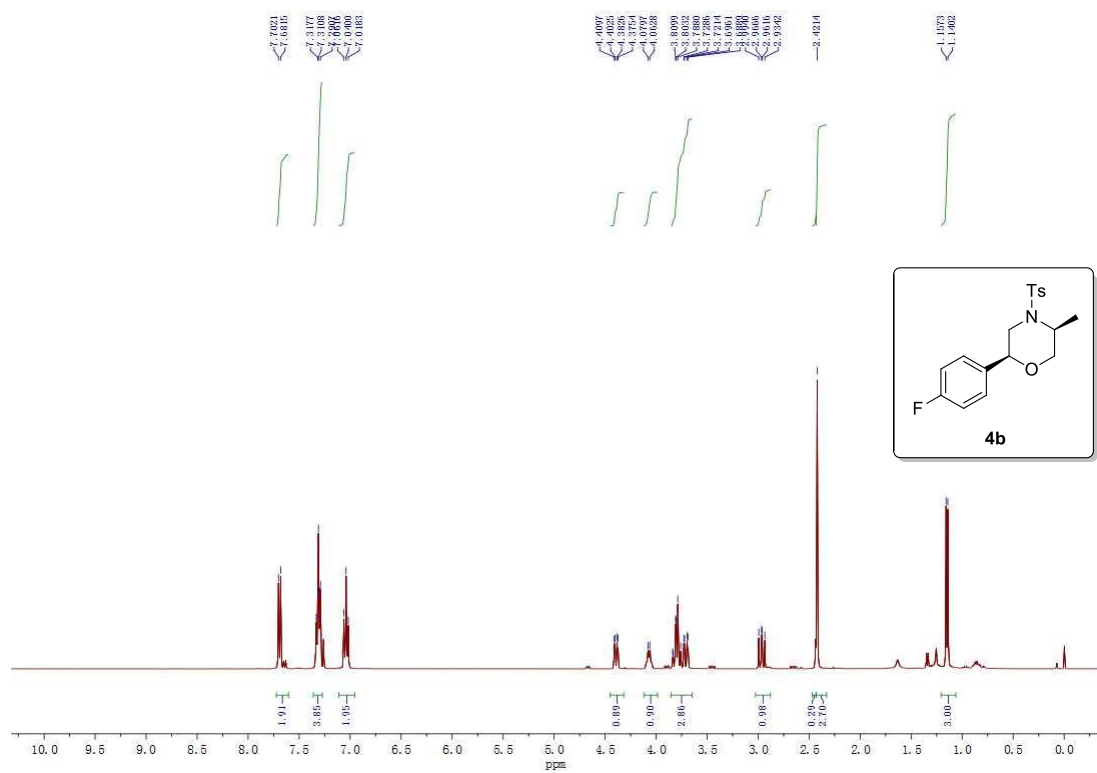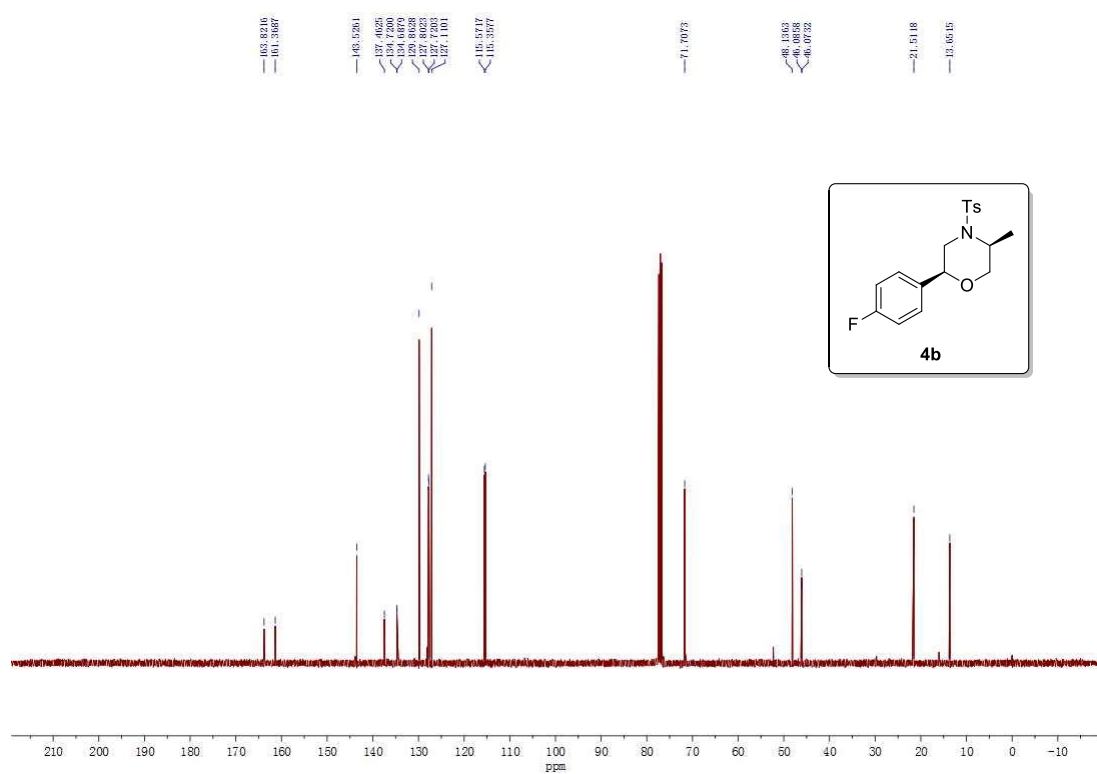

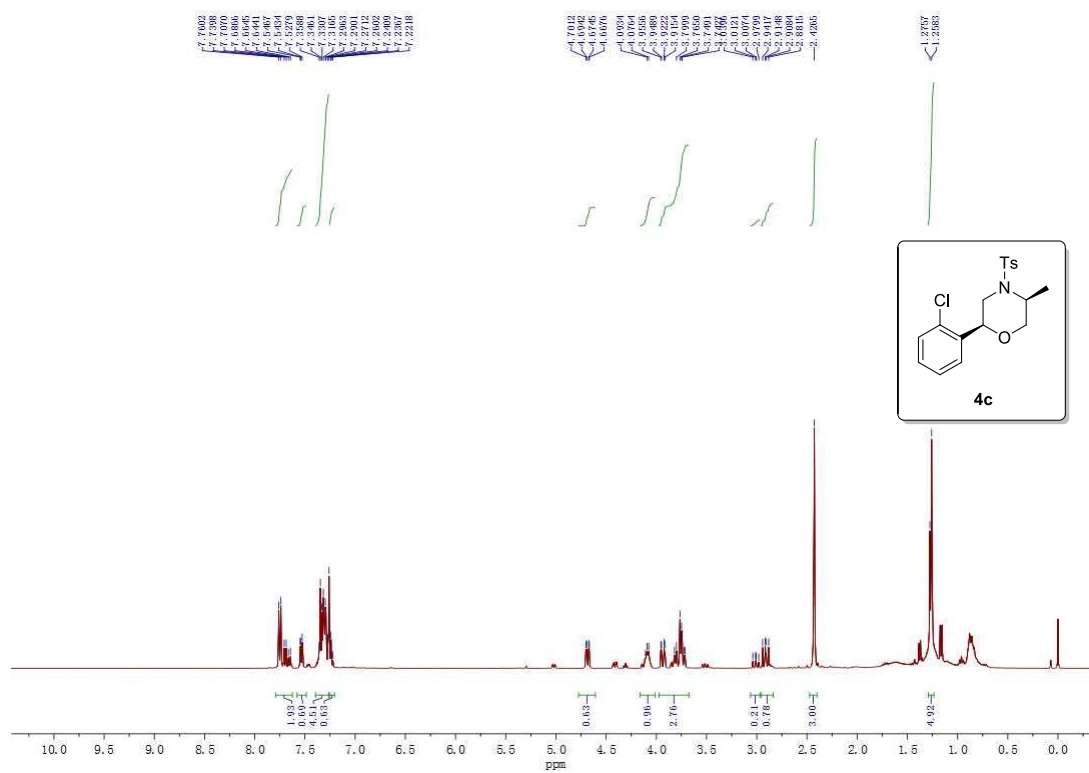

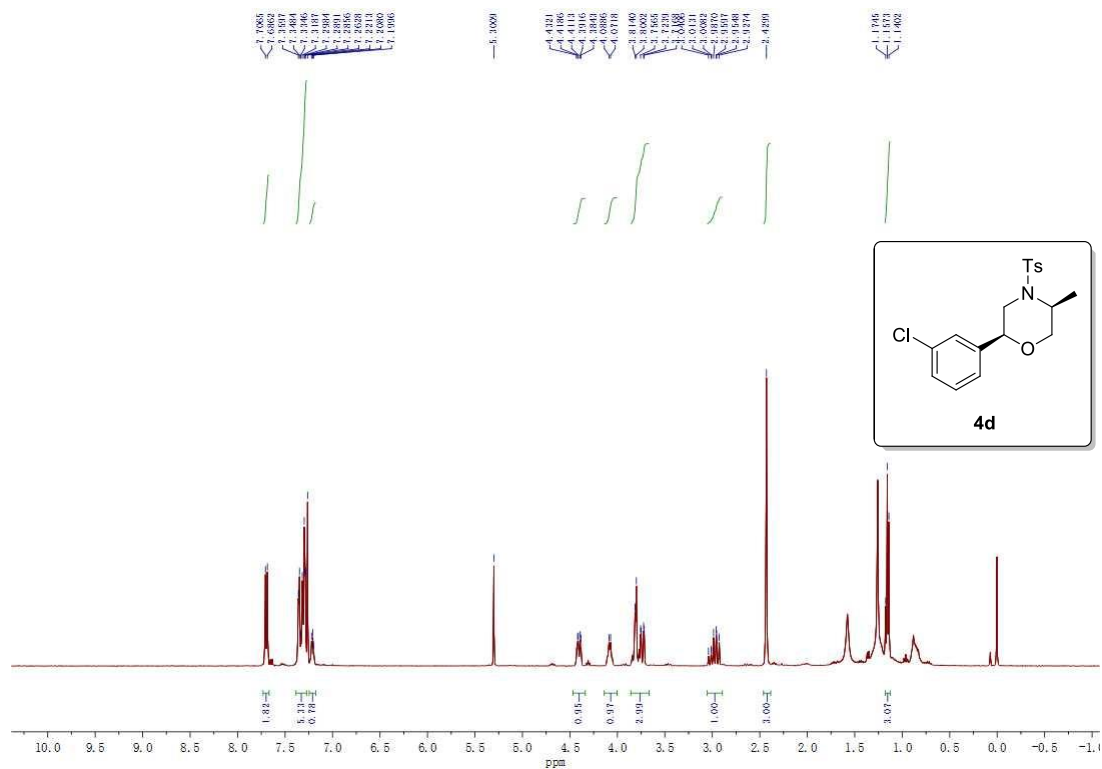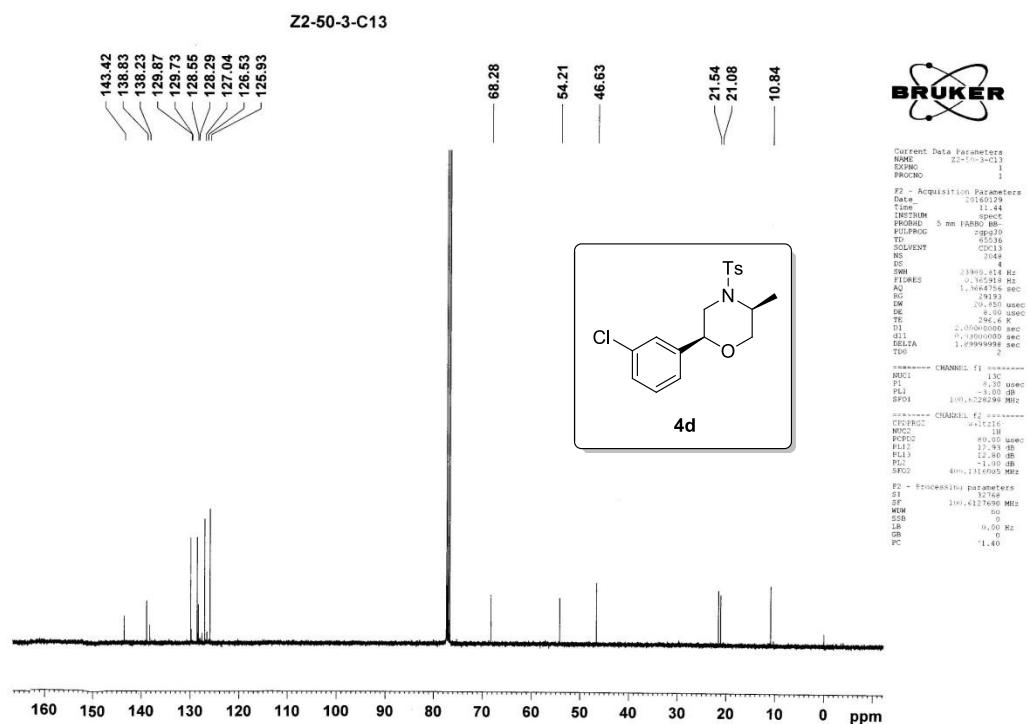

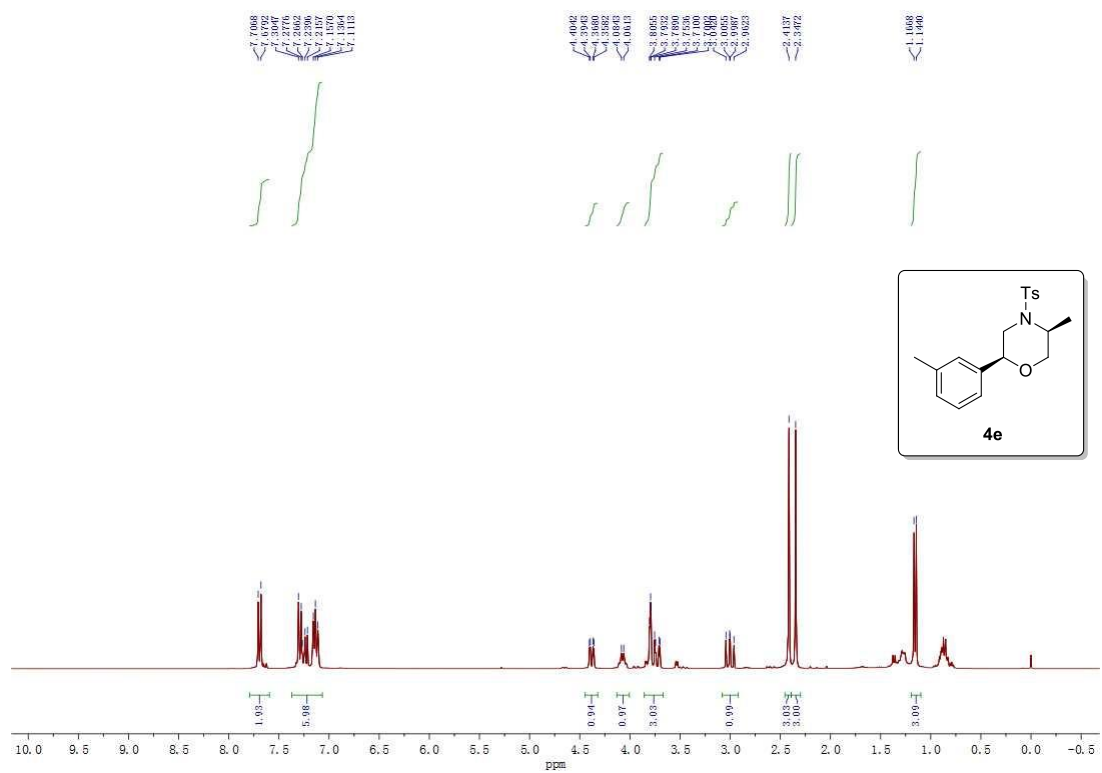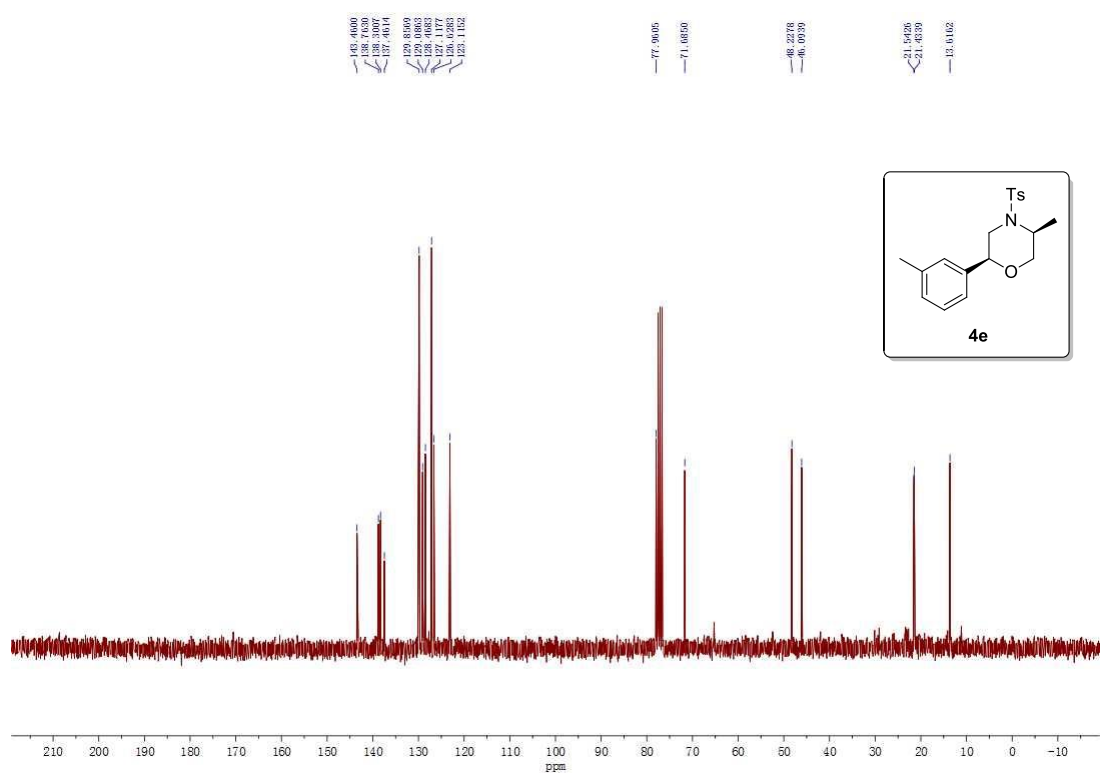

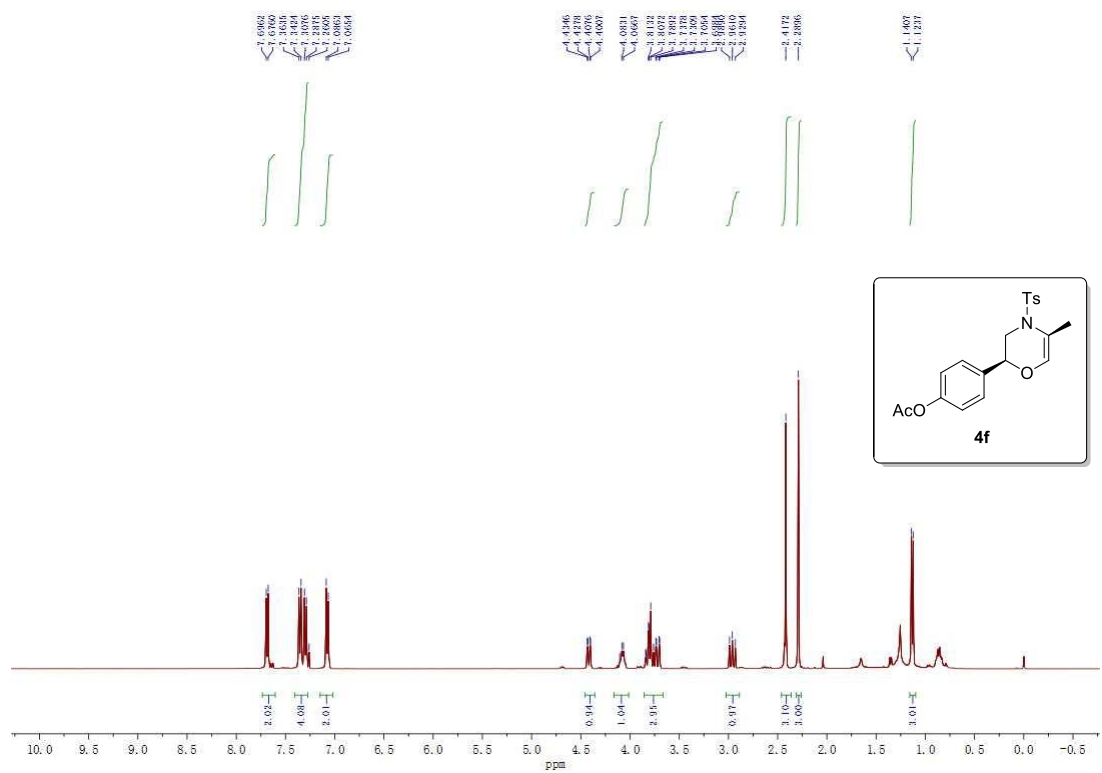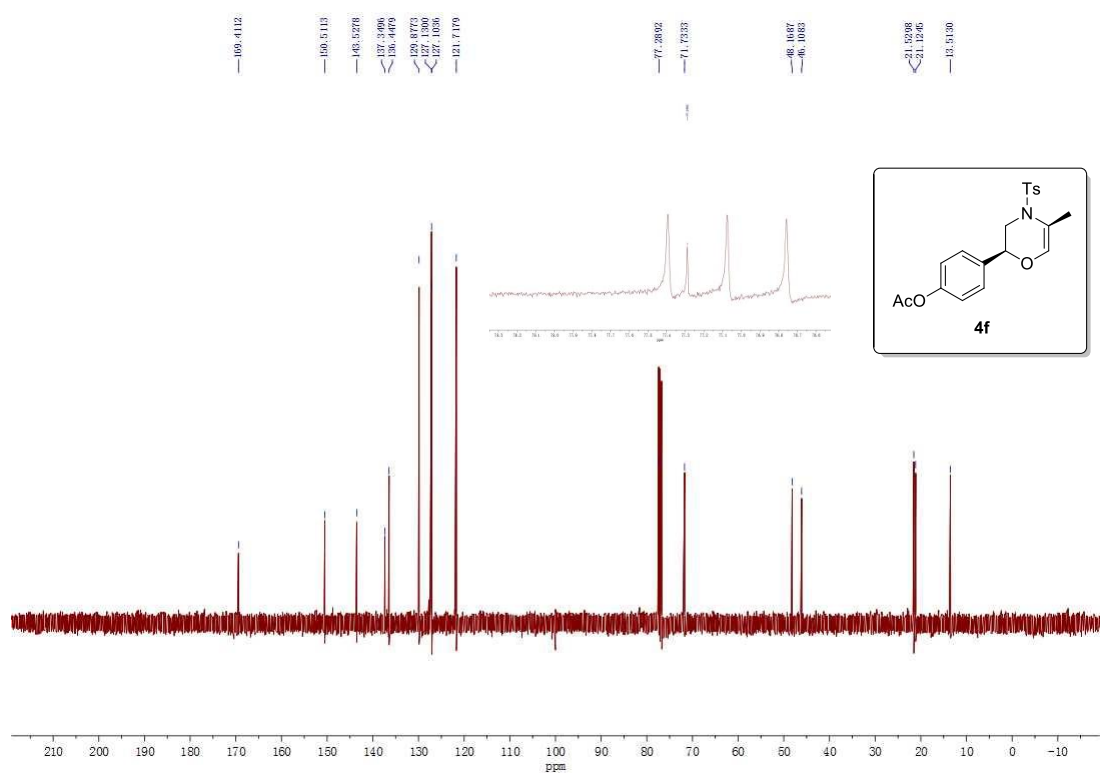

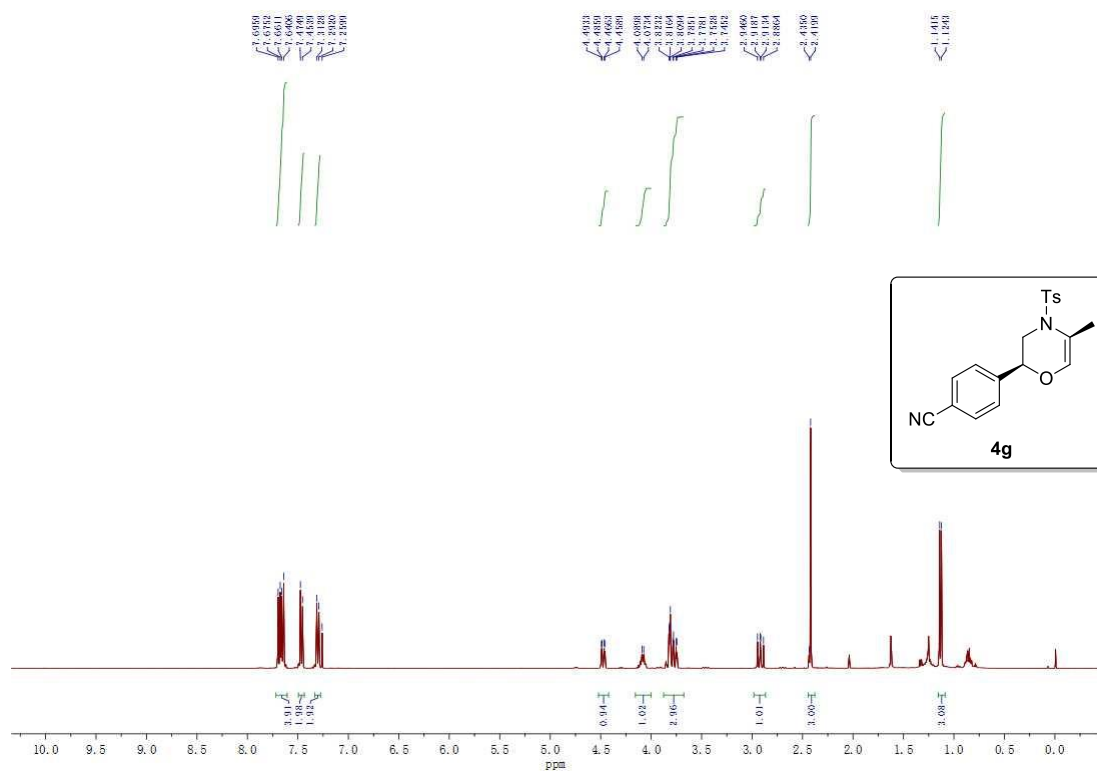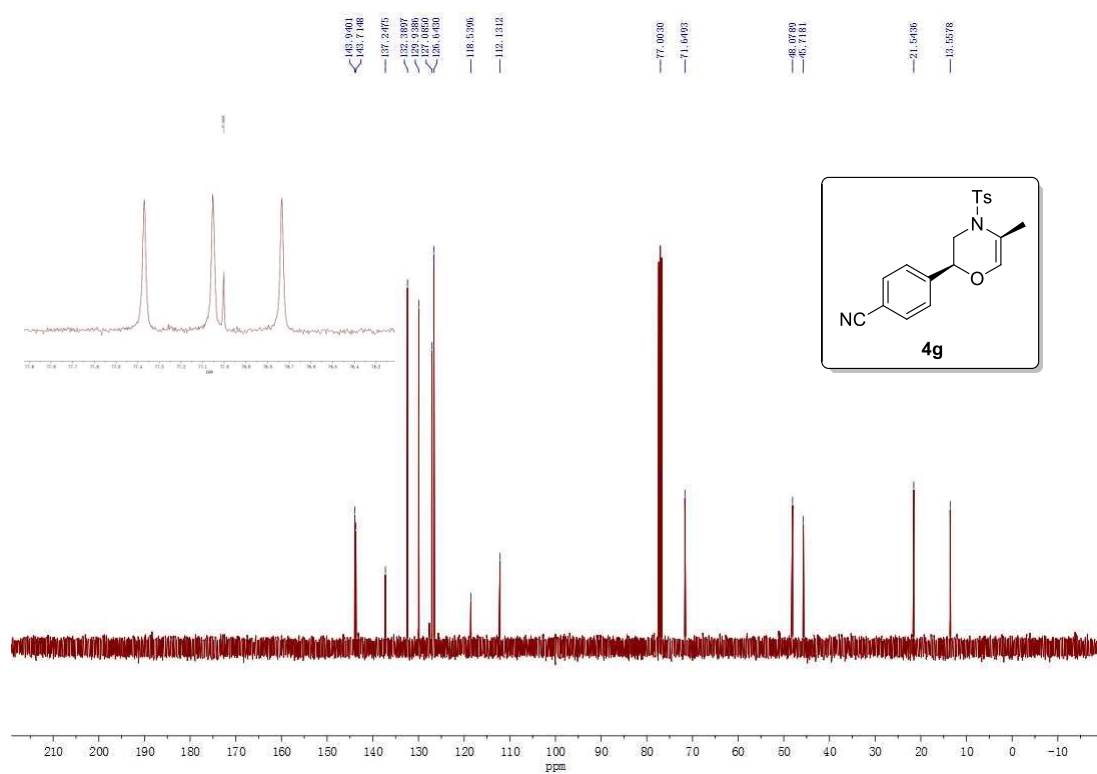

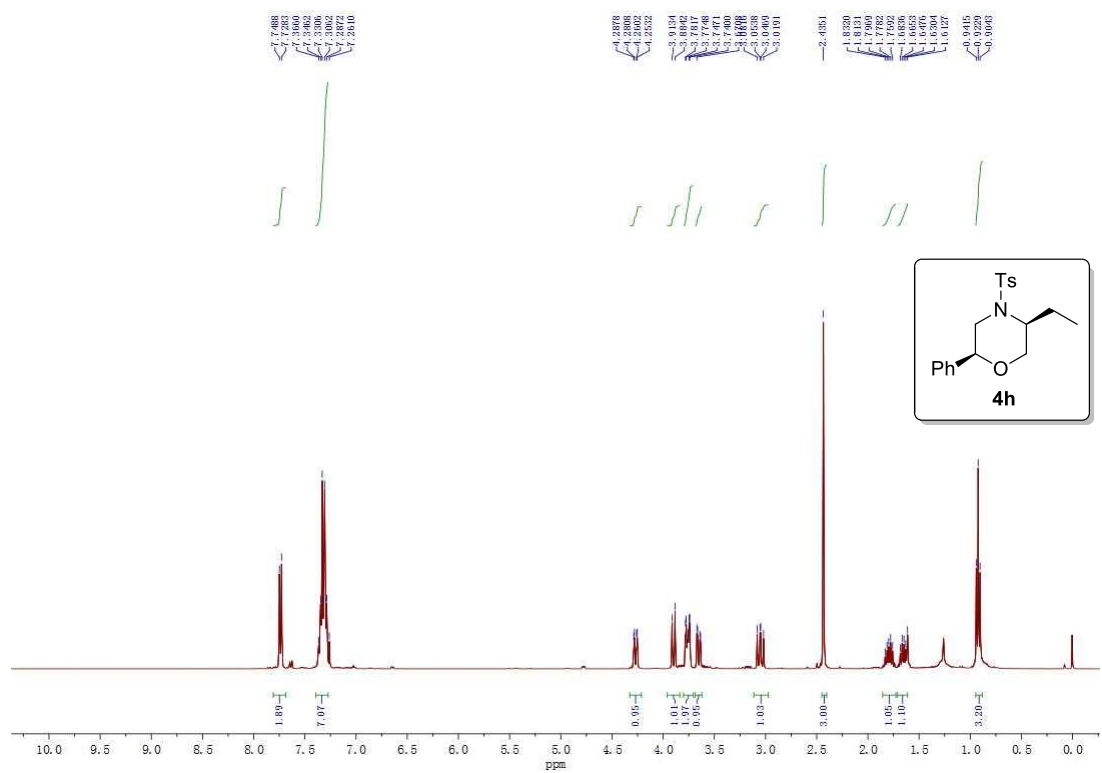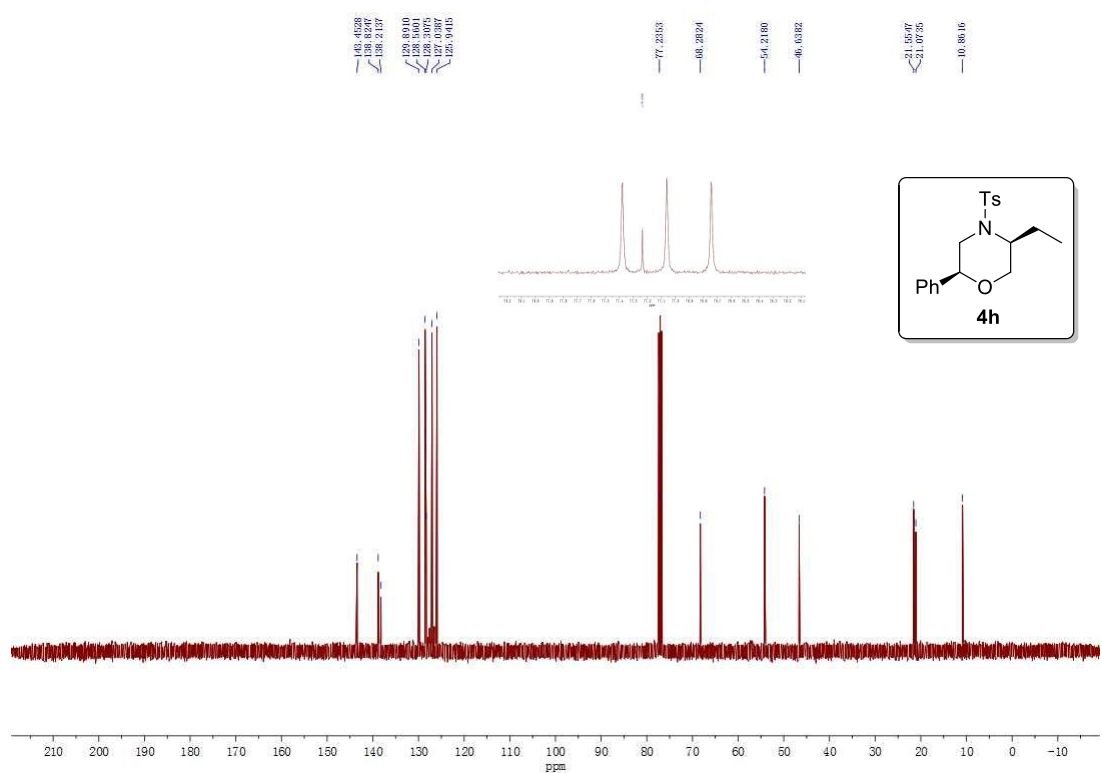

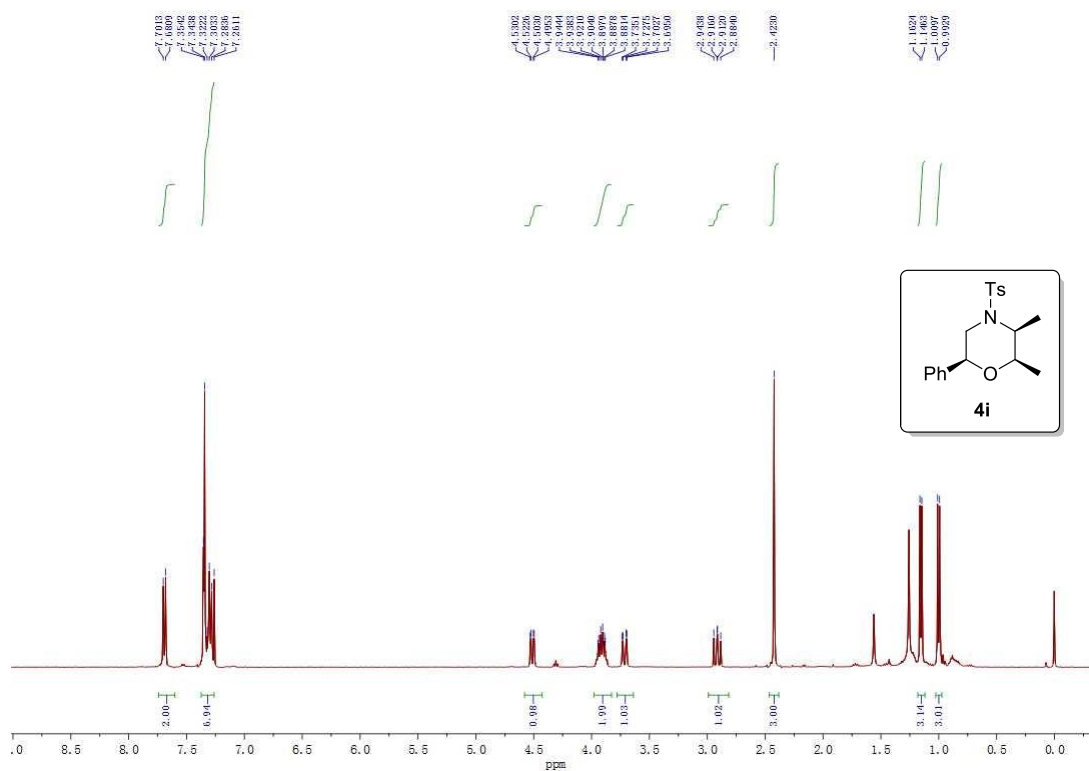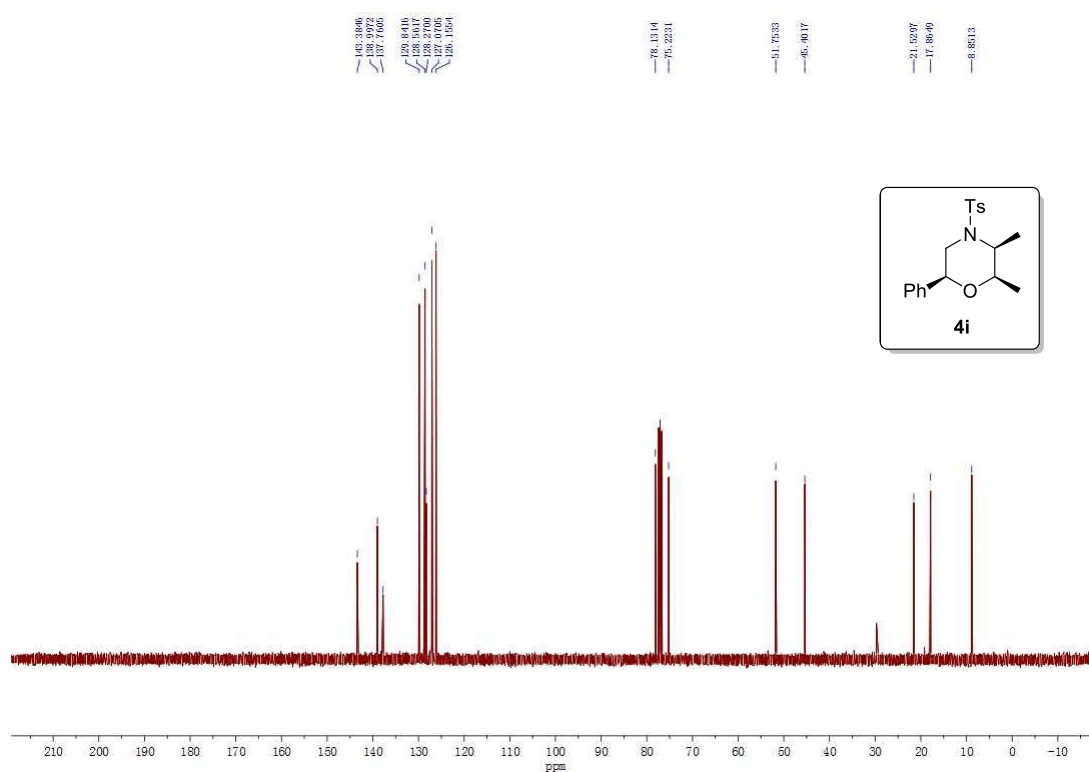



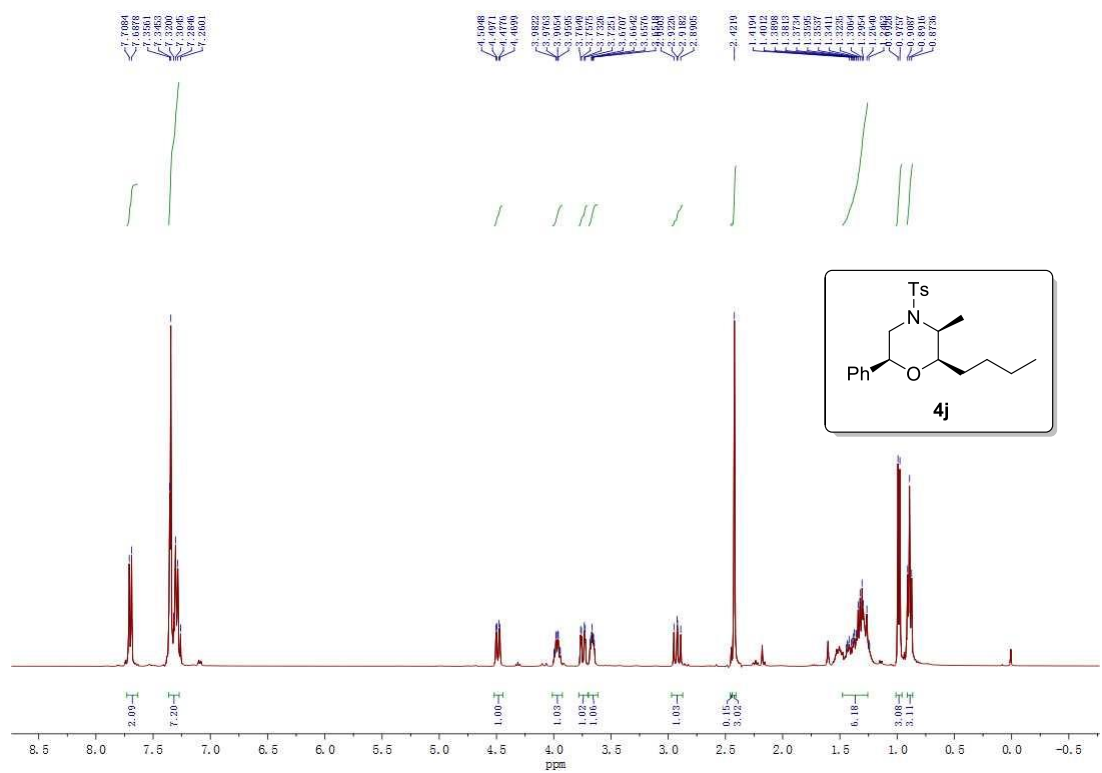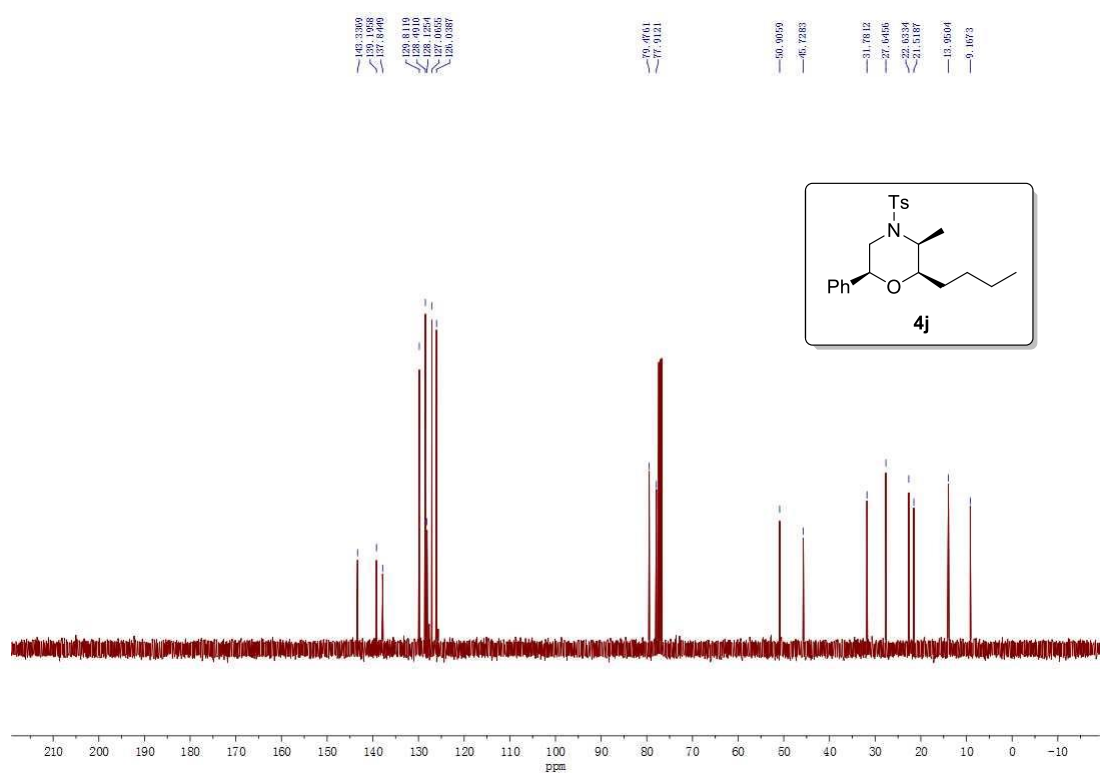

### 3. HRMS Spectra of Products

| Sample Name   | 2015-0624-22-01      | Position    | P1-E9  | Instrument Name | Instrument 1 | User Name              |
|---------------|----------------------|-------------|--------|-----------------|--------------|------------------------|
| Inj Vol       | -1                   | InjPosition |        | SampleType      | Sample       | IRM Calibration Status |
| Data Filename | 2015-0624-22-01-81.d | ACQ Method  | 0103.m | Comment         |              | Acquired Time          |

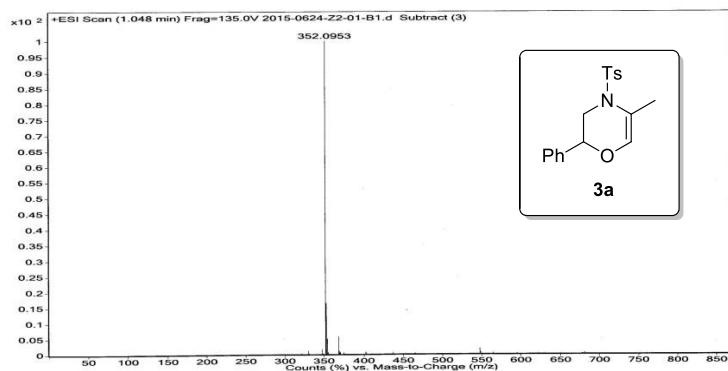

| Sample Name   | 2015-1015-22-46-2   | Position    | P1-C7  | Instrument Name | Instrument 1 | User Name              |
|---------------|---------------------|-------------|--------|-----------------|--------------|------------------------|
| Inj Vol       | -1                  | InjPosition |        | SampleType      | Sample       | IRM Calibration Status |
| Data Filename | 2015-1015-22-46-2.d | ACQ Method  | 0103.m | Comment         |              | Acquired Time          |

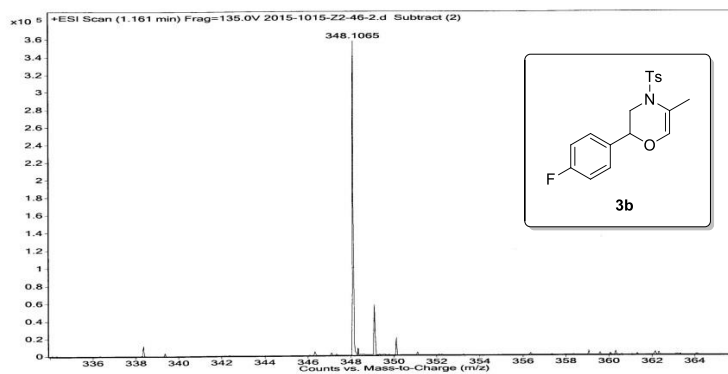

| Sample Name   | 2015-1217-22-58-2   | Position    | P1-E9  | Instrument Name | Instrument 1 | User Name              |
|---------------|---------------------|-------------|--------|-----------------|--------------|------------------------|
| Inj Vol       | -1                  | InjPosition |        | SampleType      | Sample       | IRM Calibration Status |
| Data Filename | 2015-1217-22-58-2.d | ACQ Method  | 0103.m | Comment         |              | Acquired Time          |

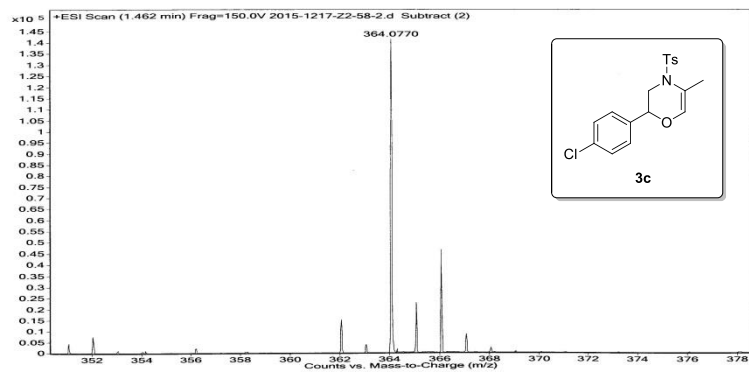

| Sample Name   | 2015-0924-22-43-2   | Position    | P1-D9  | Instrument Name | Instrument 1 | User Name              |                      |
|---------------|---------------------|-------------|--------|-----------------|--------------|------------------------|----------------------|
| Inj Vol       | -1                  | InjPosition |        | SampleType      | Sample       | IRM Calibration Status | Success              |
| Data Filename | 2015-0924-22-43-2.d | ACQ Method  | 0103.m | Comment         |              | Acquired Time          | 9/24/2015 3:53:30 PM |

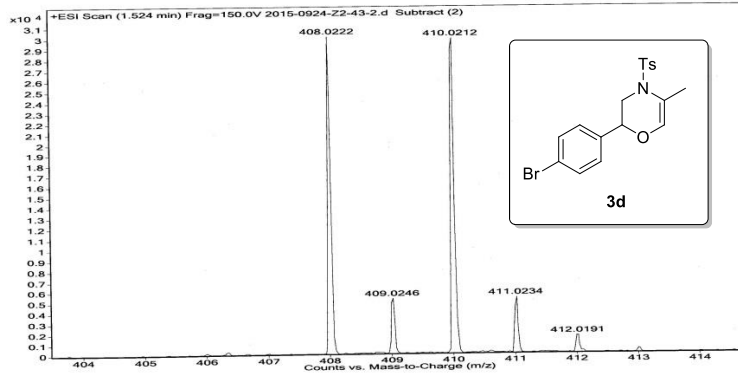

| Sample Name   | 20160126-22-49-2   | Position    | P1-F9  | Instrument Name | Instrument 1 | User Name              |                      |
|---------------|--------------------|-------------|--------|-----------------|--------------|------------------------|----------------------|
| Inj Vol       | -1                 | InjPosition |        | SampleType      | Sample       | IRM Calibration Status | Success              |
| Data Filename | 20160126-22-49-2.d | ACQ Method  | 0103.m | Comment         |              | Acquired Time          | 1/26/2016 3:31:38 PM |

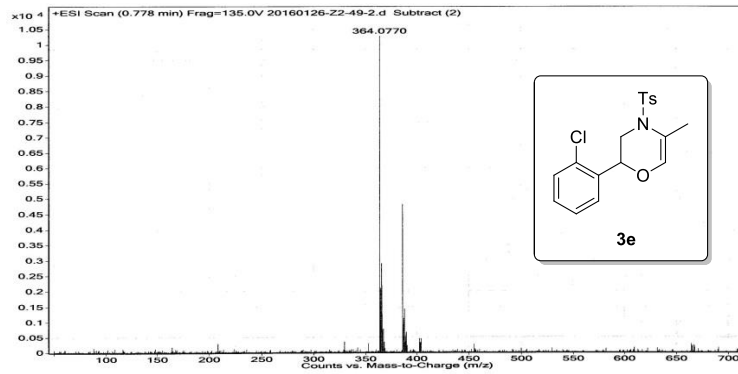

| Sample Name   | Unavailable        | Position    | Unavailable | Instrument Name | Unavailable                       | User Name              | Unavailable |
|---------------|--------------------|-------------|-------------|-----------------|-----------------------------------|------------------------|-------------|
| Inj Vol       | Unavailable        | InjPosition | Unavailable | SampleType      | Unavailable                       | IRM Calibration Status | Success     |
| Data Filename | 20160126-22-50-2.d | ACQ Method  | Unavailable | Comment         | Sample information is unavailable | Acquired Time          | Unavailable |

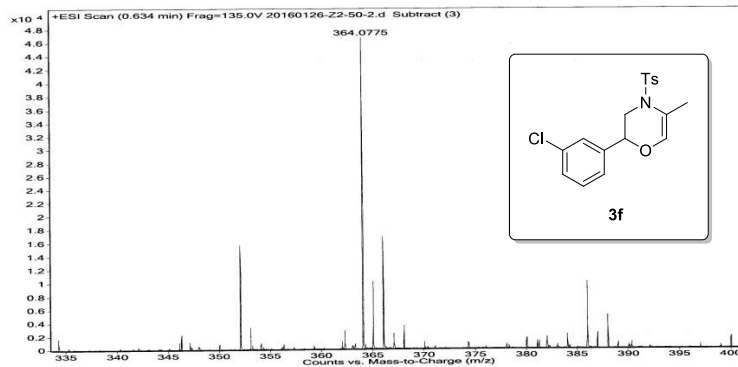

**Sample Name** 2015-1217-22-61-2    **Position** P1-C9    **Instrument Name** Instrument 1    **User Name**  
**Inj Vol** -1    **InjPosition**    **SampleType** Sample    **IRM Calibration Status** Success  
**Data Filename** 2015-1217-22-61-2.d    **ACQ Method** 0103.m    **Comment**    **Acquired Time** 12/17/2015 3:02:22 PM

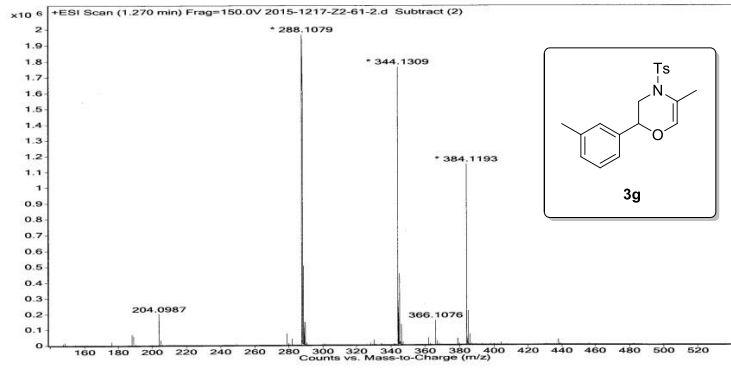

**Sample Name** 2015-1105-22-52-2    **Position** P1-A7    **Instrument Name** Instrument 1    **User Name**  
**Inj Vol** -1    **InjPosition**    **SampleType** Sample    **IRM Calibration Status** Success  
**Data Filename** 2015-1105-22-52-2.d    **ACQ Method** 0103.m    **Comment**    **Acquired Time** 11/5/2015 3:36:13 PM

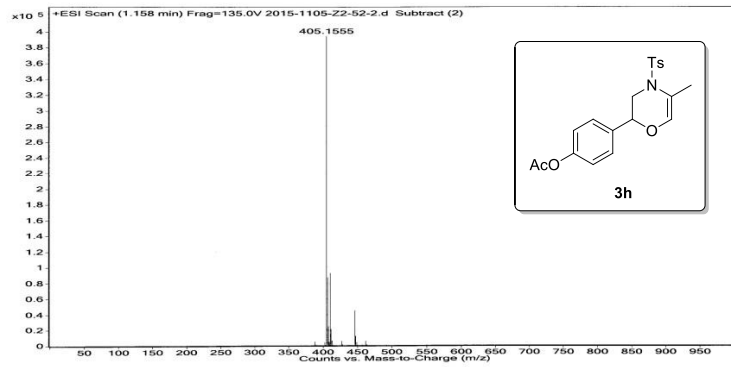

**Sample Name** 2015-1105-22-51-2    **Position** P1-C7    **Instrument Name** Instrument 1    **User Name**  
**Inj Vol** -1    **InjPosition**    **SampleType** Sample    **IRM Calibration Status** Success  
**Data Filename** 2015-1105-22-51-2.d    **ACQ Method** 0103.m    **Comment**    **Acquired Time** 11/5/2015 3:30:10 PM

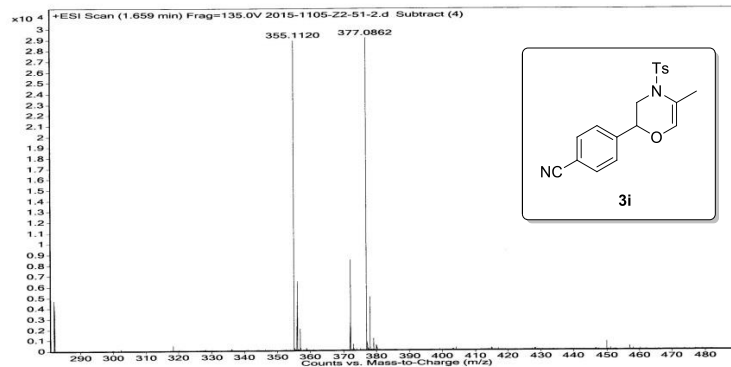

| Sample Name   | 2015-0924-22-44-2   | Position    | P1-C9  | Instrument Name | Instrument 1 | User Name              |
|---------------|---------------------|-------------|--------|-----------------|--------------|------------------------|
| Inj Vol       | -1                  | InjPosition |        | SampleType      | Sample       | IRM Calibration Status |
| Data Filename | 2015-0924-22-44-2.d | ACQ Method  | 0103.m | Comment         |              | Success                |
|               |                     |             |        |                 |              | 9/24/2015 3:55:50 PM   |

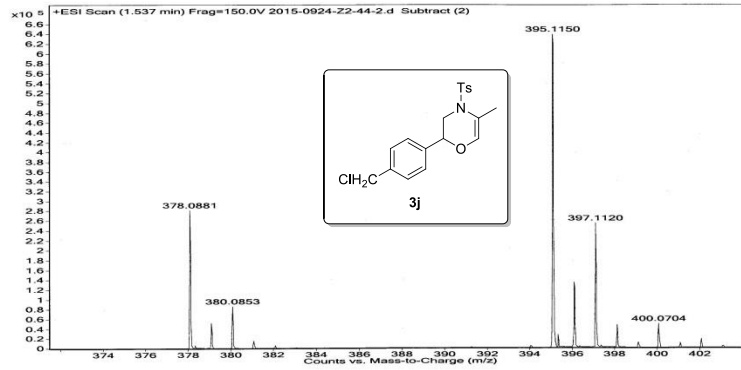

| Sample Name   | 20151203-22-55-2   | Position    | P1-F7  | Instrument Name | Instrument 1 | User Name              |
|---------------|--------------------|-------------|--------|-----------------|--------------|------------------------|
| Inj Vol       | -1                 | InjPosition |        | SampleType      | Sample       | IRM Calibration Status |
| Data Filename | 20151203-22-55-2.d | ACQ Method  | 0103.m | Comment         |              | Success                |
|               |                    |             |        |                 |              | 12/3/2015 3:58:49 PM   |

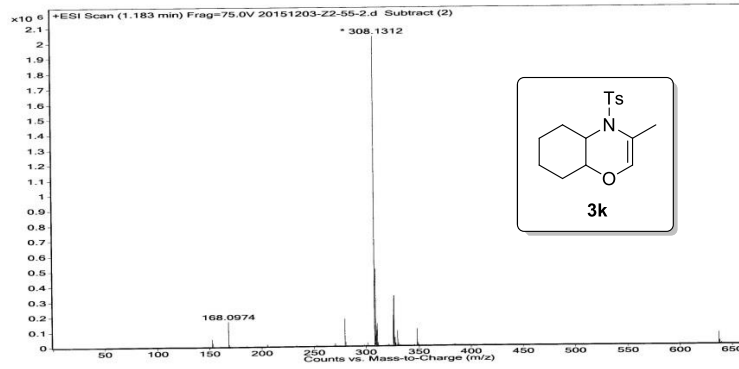

| Sample Name   | 20151203-22-56-2   | Position    | P1-E7  | Instrument Name | Instrument 1 | User Name              |
|---------------|--------------------|-------------|--------|-----------------|--------------|------------------------|
| Inj Vol       | -1                 | InjPosition |        | SampleType      | Sample       | IRM Calibration Status |
| Data Filename | 20151203-22-56-2.d | ACQ Method  | 0103.m | Comment         |              | Success                |
|               |                    |             |        |                 |              | 12/3/2015 4:01:28 PM   |

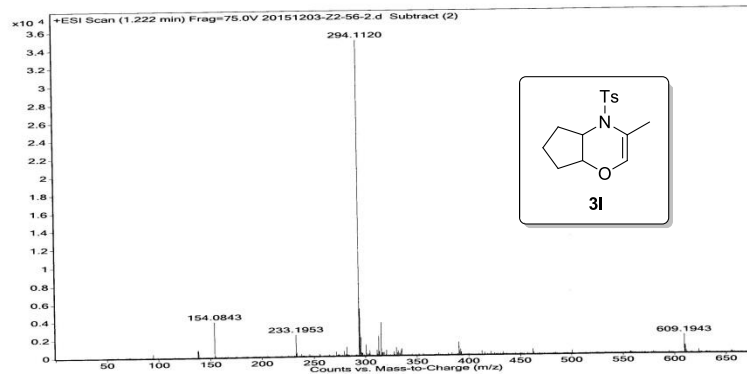

| Sample Name   | 20151203-22-59-2   | Position    | P1-87  | Instrument Name | Instrument 1 | User Name              |                      |
|---------------|--------------------|-------------|--------|-----------------|--------------|------------------------|----------------------|
| Inj Vol       | -1                 | InjPosition |        | SampleType      | Sample       | IRM Calibration Status | Success              |
| Data Filename | 20151203-22-59-2.d | ACQ Method  | 0103.m | Comment         |              | Acquired Time          | 12/3/2015 3:47:36 PM |

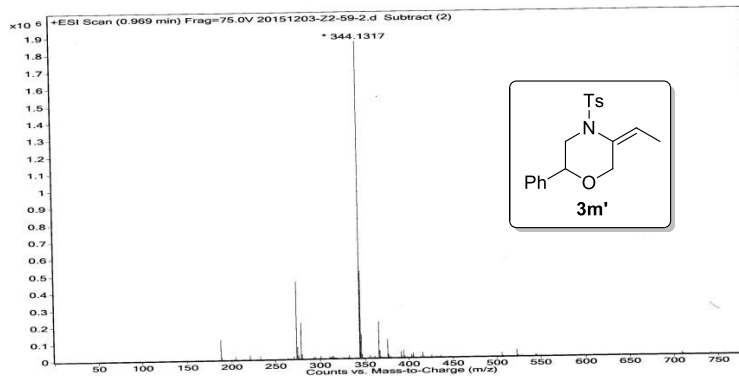

| Sample Name   | 20160126-22-60-3A   | Position    | P1-E9  | Instrument Name | Instrument 1 | User Name              |                      |
|---------------|---------------------|-------------|--------|-----------------|--------------|------------------------|----------------------|
| Inj Vol       | -1                  | InjPosition |        | SampleType      | Sample       | IRM Calibration Status | Success              |
| Data Filename | 20160126-22-60-3A.d | ACQ Method  | 0103.m | Comment         |              | Acquired Time          | 1/26/2016 3:34:02 PM |

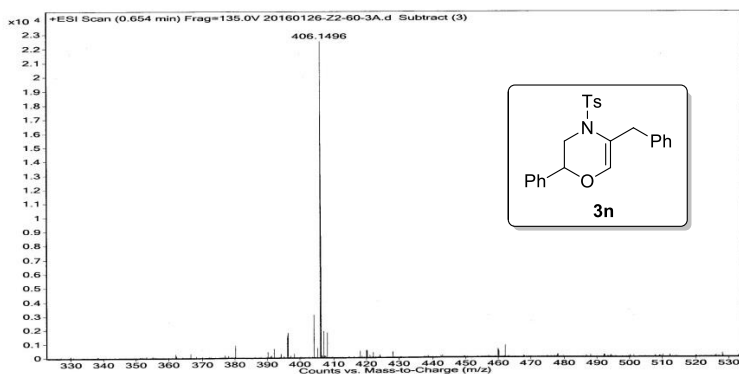

| Sample Name   | Unavailable         | Position    | Unavailable | Instrument Name | Unavailable                       | User Name              | Unavailable |
|---------------|---------------------|-------------|-------------|-----------------|-----------------------------------|------------------------|-------------|
| Inj Vol       | Unavailable         | InjPosition | Unavailable | SampleType      | Unavailable                       | IRM Calibration Status | Success     |
| Data Filename | 20160126-22-60-3B.d | ACQ Method  |             | Comment         | Sample information is unavailable | Acquired Time          | Unavailable |

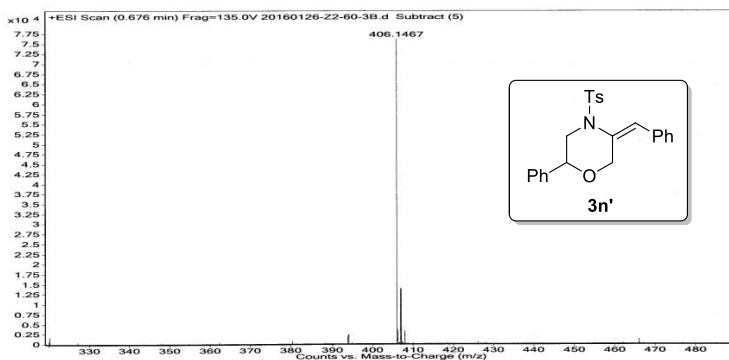

| Sample Name   | 2015-1217-22-62-1   | Position    | P1-B9  | Instrument Name | Instrument 1 | User Name              |                       |
|---------------|---------------------|-------------|--------|-----------------|--------------|------------------------|-----------------------|
| Inj Vol       | -1                  | InjPosition |        | SampleType      | Sample       | IRM Calibration Status | Success               |
| Data Filename | 2015-1217-22-62-1.d | ACQ Method  | 0103.m | Comment         |              | Acquired Time          | 12/17/2015 3:05:11 PM |

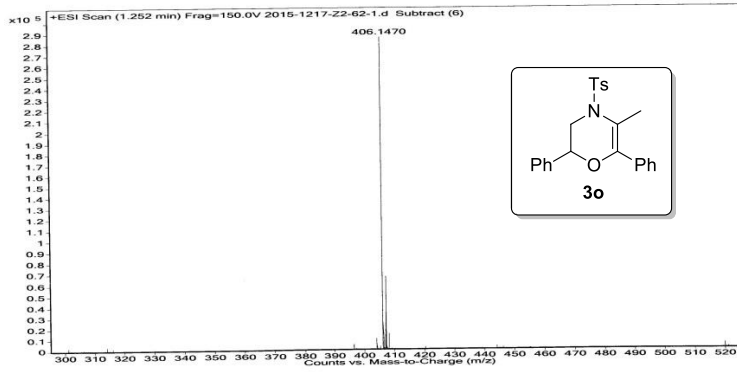

| Sample Name   | 2016-0506-23-18-2   | Position    | P1-F9  | Instrument Name | Instrument 1 | User Name              |                      |
|---------------|---------------------|-------------|--------|-----------------|--------------|------------------------|----------------------|
| Inj Vol       | -1                  | InjPosition |        | SampleType      | Sample       | IRM Calibration Status | Success              |
| Data Filename | 2016-0506-23-18-2.d | ACQ Method  | 0103.m | Comment         |              | Acquired Time          | 5/6/2016 10:40:56 AM |

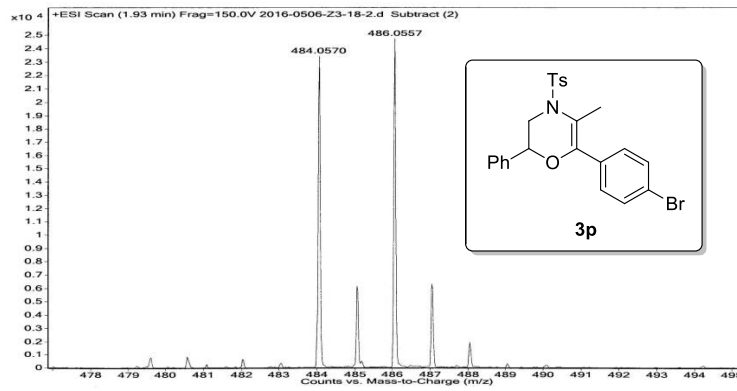

| Sample Name   | 2016-0427-23-22-1   | Position    | P1-C9  | Instrument Name | Instrument 1 | User Name              |                      |
|---------------|---------------------|-------------|--------|-----------------|--------------|------------------------|----------------------|
| Inj Vol       | -1                  | InjPosition |        | SampleType      | Sample       | IRM Calibration Status | Success              |
| Data Filename | 2016-0427-23-22-1.d | ACQ Method  | 0103.m | Comment         |              | Acquired Time          | 4/27/2016 2:59:19 PM |

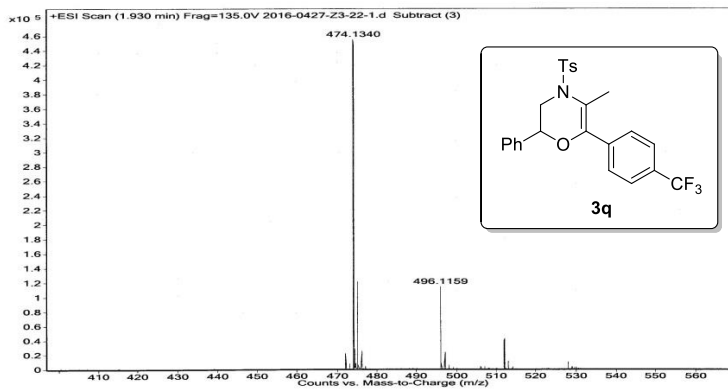

| Sample Name   | 2016-0427-Z3-20-1   | Position    | P1-E9  | Instrument Name | Instrument 1 | User Name              |
|---------------|---------------------|-------------|--------|-----------------|--------------|------------------------|
| Inj Vol       | -1                  | InjPosition |        | SampleType      | Sample       | IRM Calibration Status |
| Data Filename | 2016-0427-Z3-20-1.d | ACQ Method  | 0103.m | Comment         |              | Success                |
|               |                     |             |        |                 |              | 4/27/2016 2:53:28 PM   |

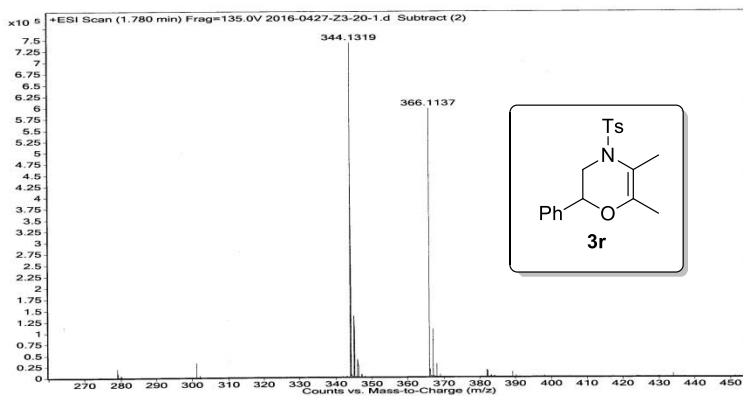

| Sample Name   | 2016-0427-Z3-21-1   | Position    | P1-D9  | Instrument Name | Instrument 1 | User Name              |
|---------------|---------------------|-------------|--------|-----------------|--------------|------------------------|
| Inj Vol       | -1                  | InjPosition |        | SampleType      | Sample       | IRM Calibration Status |
| Data Filename | 2016-0427-Z3-21-1.d | ACQ Method  | 0103.m | Comment         |              | Success                |
|               |                     |             |        |                 |              | 4/27/2016 2:56:19 PM   |

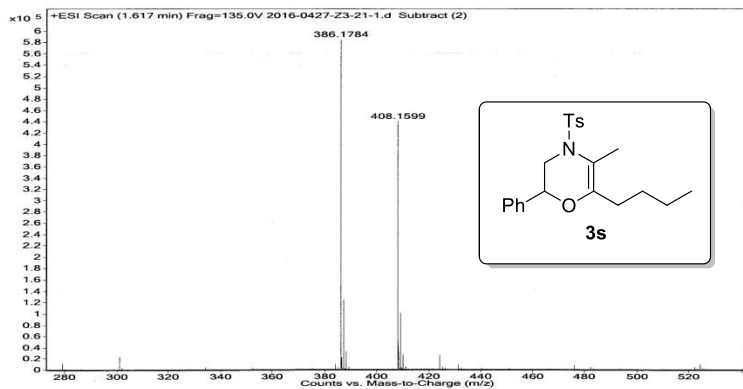

| Sample Name   | 2015-0717-Z4-02-P1   | Position    | P1-C9  | Instrument Name | Instrument 1 | User Name              |
|---------------|----------------------|-------------|--------|-----------------|--------------|------------------------|
| Inj Vol       | -1                   | InjPosition |        | SampleType      | Sample       | IRM Calibration Status |
| Data Filename | 2015-0717-Z4-02-P1.d | ACQ Method  | 0103.m | Comment         |              | Success                |
|               |                      |             |        |                 |              | 7/17/2015 4:14:08 PM   |

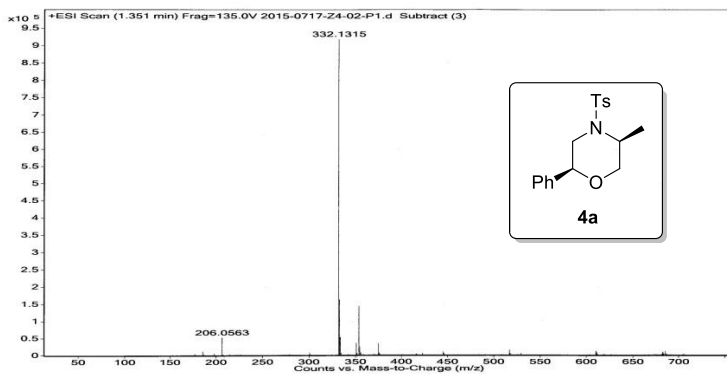



| Sample Name   | 2015-1023-Z2-46-3   | Position    | P1-E8  | Instrument Name | Instrument 1 | User Name              |
|---------------|---------------------|-------------|--------|-----------------|--------------|------------------------|
| Inj Vol       | -1                  | InjPosition |        | SampleType      | Sample       | IRM Calibration Status |
| Data Filename | 2015-1023-Z2-46-3.d | ACQ Method  | 0103.m | Comment         |              | Acquired Time          |

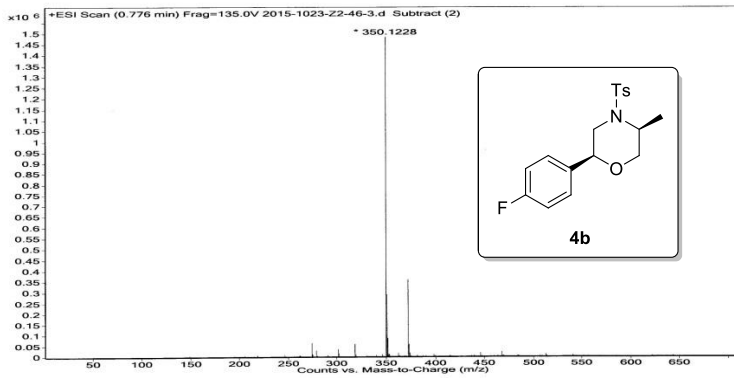

| Sample Name   | 2015-1105-Z2-49-3   | Position    | P1-F7  | Instrument Name | Instrument 1 | User Name              |
|---------------|---------------------|-------------|--------|-----------------|--------------|------------------------|
| Inj Vol       | -1                  | InjPosition |        | SampleType      | Sample       | IRM Calibration Status |
| Data Filename | 2015-1105-Z2-49-3.d | ACQ Method  | 0103.m | Comment         |              | Acquired Time          |

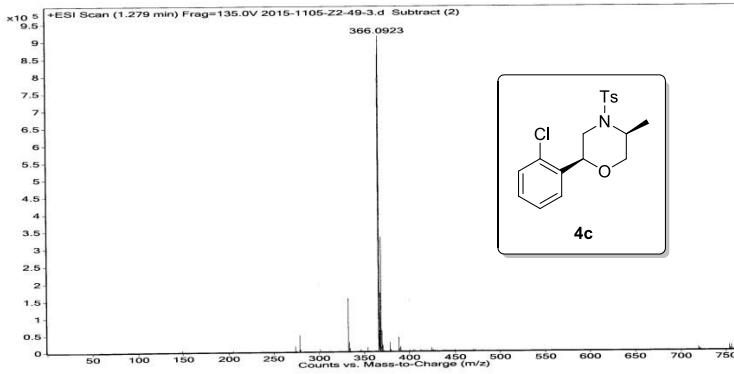

| Sample Name   | 2015-1105-Z2-50-3   | Position    | P1-D7  | Instrument Name | Instrument 1 | User Name              |
|---------------|---------------------|-------------|--------|-----------------|--------------|------------------------|
| Inj Vol       | -1                  | InjPosition |        | SampleType      | Sample       | IRM Calibration Status |
| Data Filename | 2015-1105-Z2-50-3.d | ACQ Method  | 0103.m | Comment         |              | Acquired Time          |

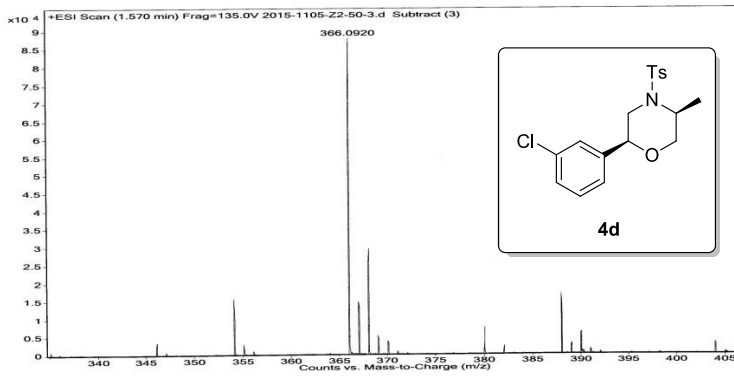

|               |                    |             |             |                 |                                   |                        |             |
|---------------|--------------------|-------------|-------------|-----------------|-----------------------------------|------------------------|-------------|
| Sample Name   | Unavailable        | Position    | Unavailable | Instrument Name | Unavailable                       | User Name              | Unavailable |
| Inj Vol       | Unavailable        | InjPosition | Unavailable | SampleType      | Unavailable                       | IRM Calibration Status | Success     |
| Data Filename | 20160126-22-61-3.d | ACQ Method  | Unavailable | Comment         | Sample information is unavailable | Acquired Time          | Unavailable |

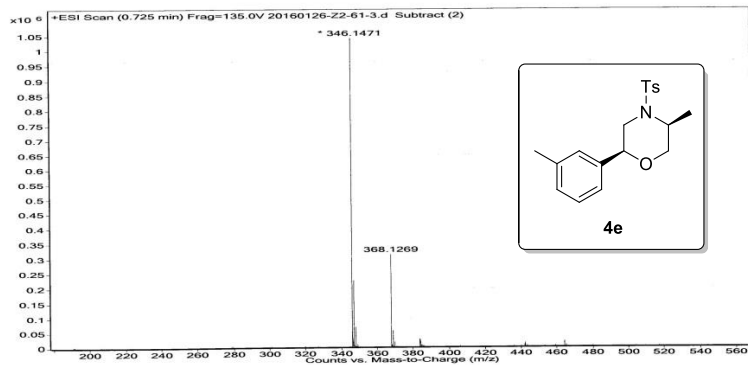

|               |                    |             |             |                 |                                   |                        |             |
|---------------|--------------------|-------------|-------------|-----------------|-----------------------------------|------------------------|-------------|
| Sample Name   | Unavailable        | Position    | Unavailable | Instrument Name | Unavailable                       | User Name              | Unavailable |
| Inj Vol       | Unavailable        | InjPosition | Unavailable | SampleType      | Unavailable                       | IRM Calibration Status | Success     |
| Data Filename | 20160126-22-52-3.d | ACQ Method  | Unavailable | Comment         | Sample information is unavailable | Acquired Time          | Unavailable |

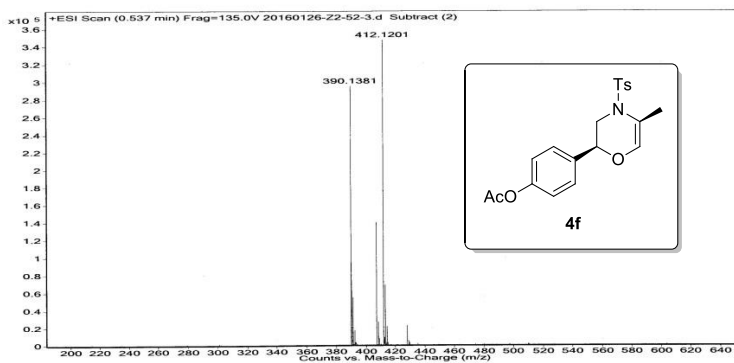

|               |                     |             |        |                 |              |                        |                      |
|---------------|---------------------|-------------|--------|-----------------|--------------|------------------------|----------------------|
| Sample Name   | 2015-1105-22-51-3   | Position    | P1-B7  | Instrument Name | Instrument 1 | User Name              |                      |
| Inj Vol       | -1                  | InjPosition |        | SampleType      | Sample       | IRM Calibration Status | Success              |
| Data Filename | 2015-1105-22-51-3.d | ACQ Method  | 0103.m | Comment         |              | Acquired Time          | 11/5/2015 3:33:12 PM |

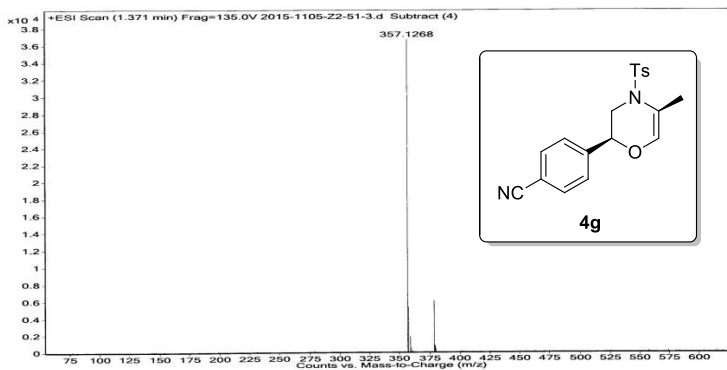

| Sample Name   | 20160126-22-61-3   | Position    | P1-E8  | Instrument Name | Instrument 1 | User Name              |
|---------------|--------------------|-------------|--------|-----------------|--------------|------------------------|
| Inj Vol       | -1                 | InjPosition |        | SampleType      | Sample       | IRM Calibration Status |
| Data Filename | 20160126-22-59-3.d | ACQ Method  | 0103.m | Comment         |              | Success                |
|               |                    |             |        |                 |              | Acquired Time          |
|               |                    |             |        |                 |              | 1/26/2016 3:53:55 PM   |

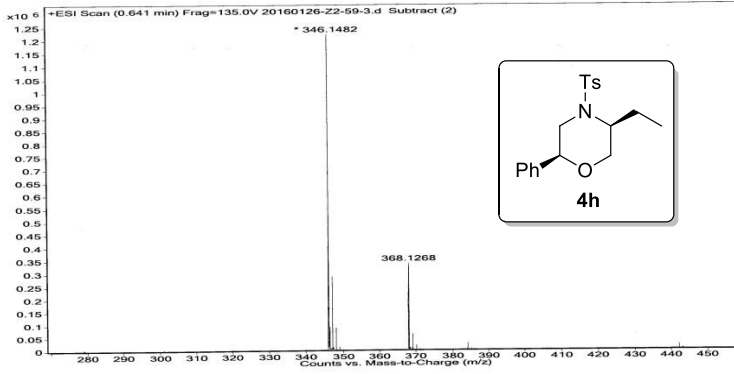

| Sample Name   | 2016-0511-23-20-2   | Position    | P1-F9  | Instrument Name | Instrument 1 | User Name              |
|---------------|---------------------|-------------|--------|-----------------|--------------|------------------------|
| Inj Vol       | -1                  | InjPosition |        | SampleType      | Sample       | IRM Calibration Status |
| Data Filename | 2016-0511-23-20-2.d | ACQ Method  | 0103.m | Comment         |              | Success                |
|               |                     |             |        |                 |              | Acquired Time          |
|               |                     |             |        |                 |              | 5/11/2016 3:10:28 PM   |

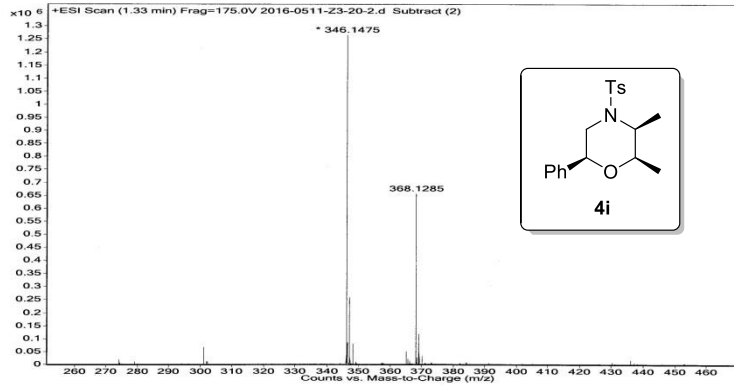

| Sample Name   | 2016-0511-23-21-2   | Position    | P1-E9  | Instrument Name | Instrument 1 | User Name              |
|---------------|---------------------|-------------|--------|-----------------|--------------|------------------------|
| Inj Vol       | -1                  | InjPosition |        | SampleType      | Sample       | IRM Calibration Status |
| Data Filename | 2016-0511-23-21-2.d | ACQ Method  | 0103.m | Comment         |              | Success                |
|               |                     |             |        |                 |              | Acquired Time          |
|               |                     |             |        |                 |              | 5/11/2016 3:13:46 PM   |

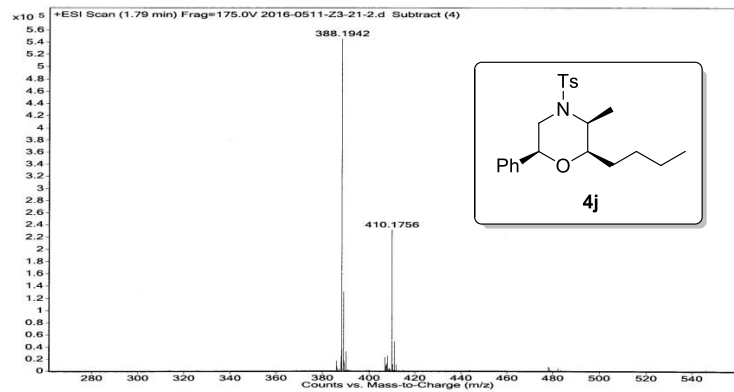

Supplement: c6ob02284g1.pdf [file c6ob02284g1.pdf]
